# Supplementary material for: Bi-mediated allylation of aldehydes in [bmim][Br]: a mechanistic investigation
Source: publisher site journal article supplement (doi:10.3762/bjoc.14.193), 2018-08-22
Supplement: Additional file 2 [file 1860-5397-14-193-S2.pdf]

## Supporting Information File 2

for

# Bi-mediated allylation of aldehydes in [bmim][Br]: a mechanistic investigation

Mrunesh Koli<sup>1</sup>, Sucheta Chatterjee<sup>1</sup>, Subrata Chattopadhyay<sup>1</sup> and Dibakar Goswami<sup>1,2\*</sup>

Address: <sup>1</sup>Bio-Organic Division, Bhabha Atomic Research Centre, Mumbai - 400 085, India and <sup>2</sup>Homi Bhabha National Institute, Training School Complex, Anushakti Nagar, Mumbai -400 094, India

Email: Dibakar Goswami - dibakarg@barc.gov.in

\*Corresponding author

## NMR SPECTRA

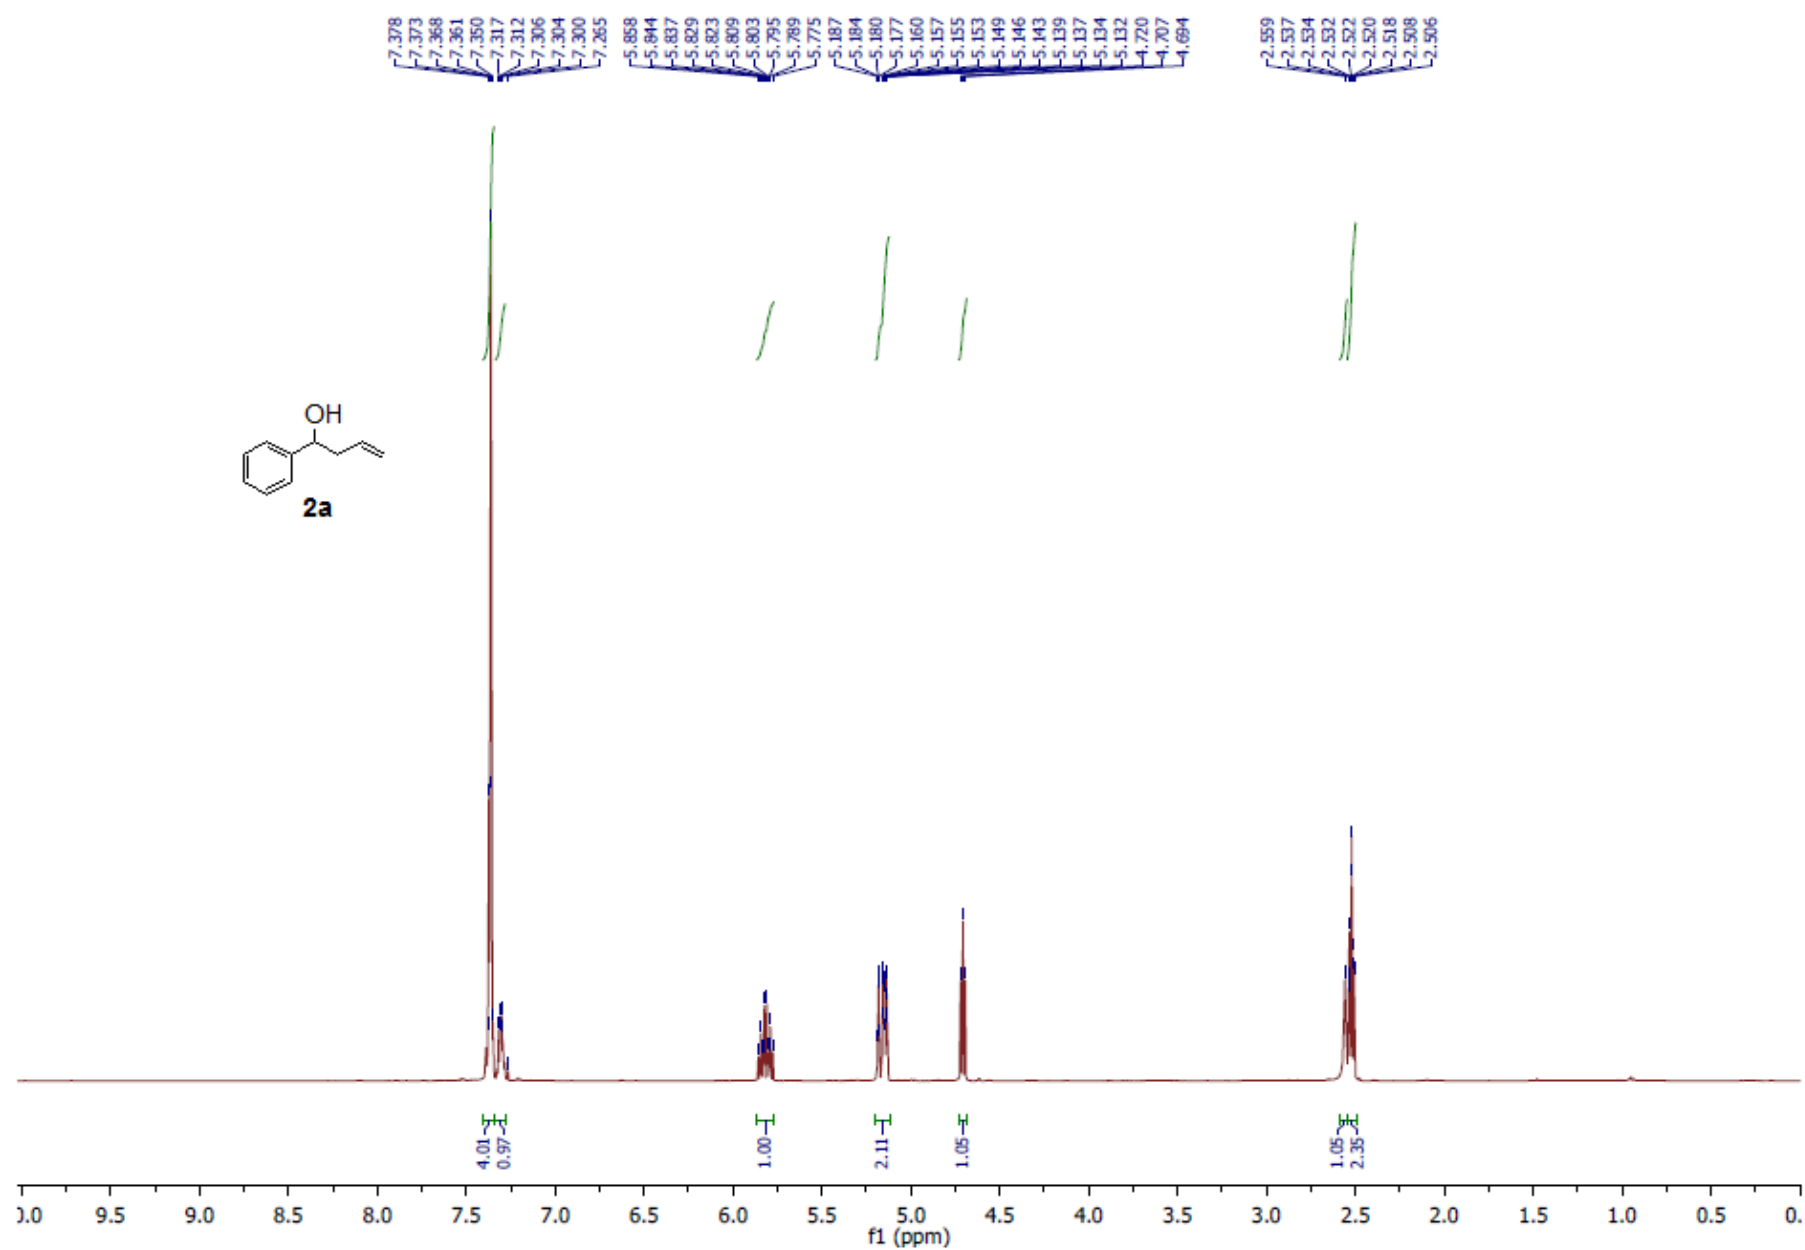

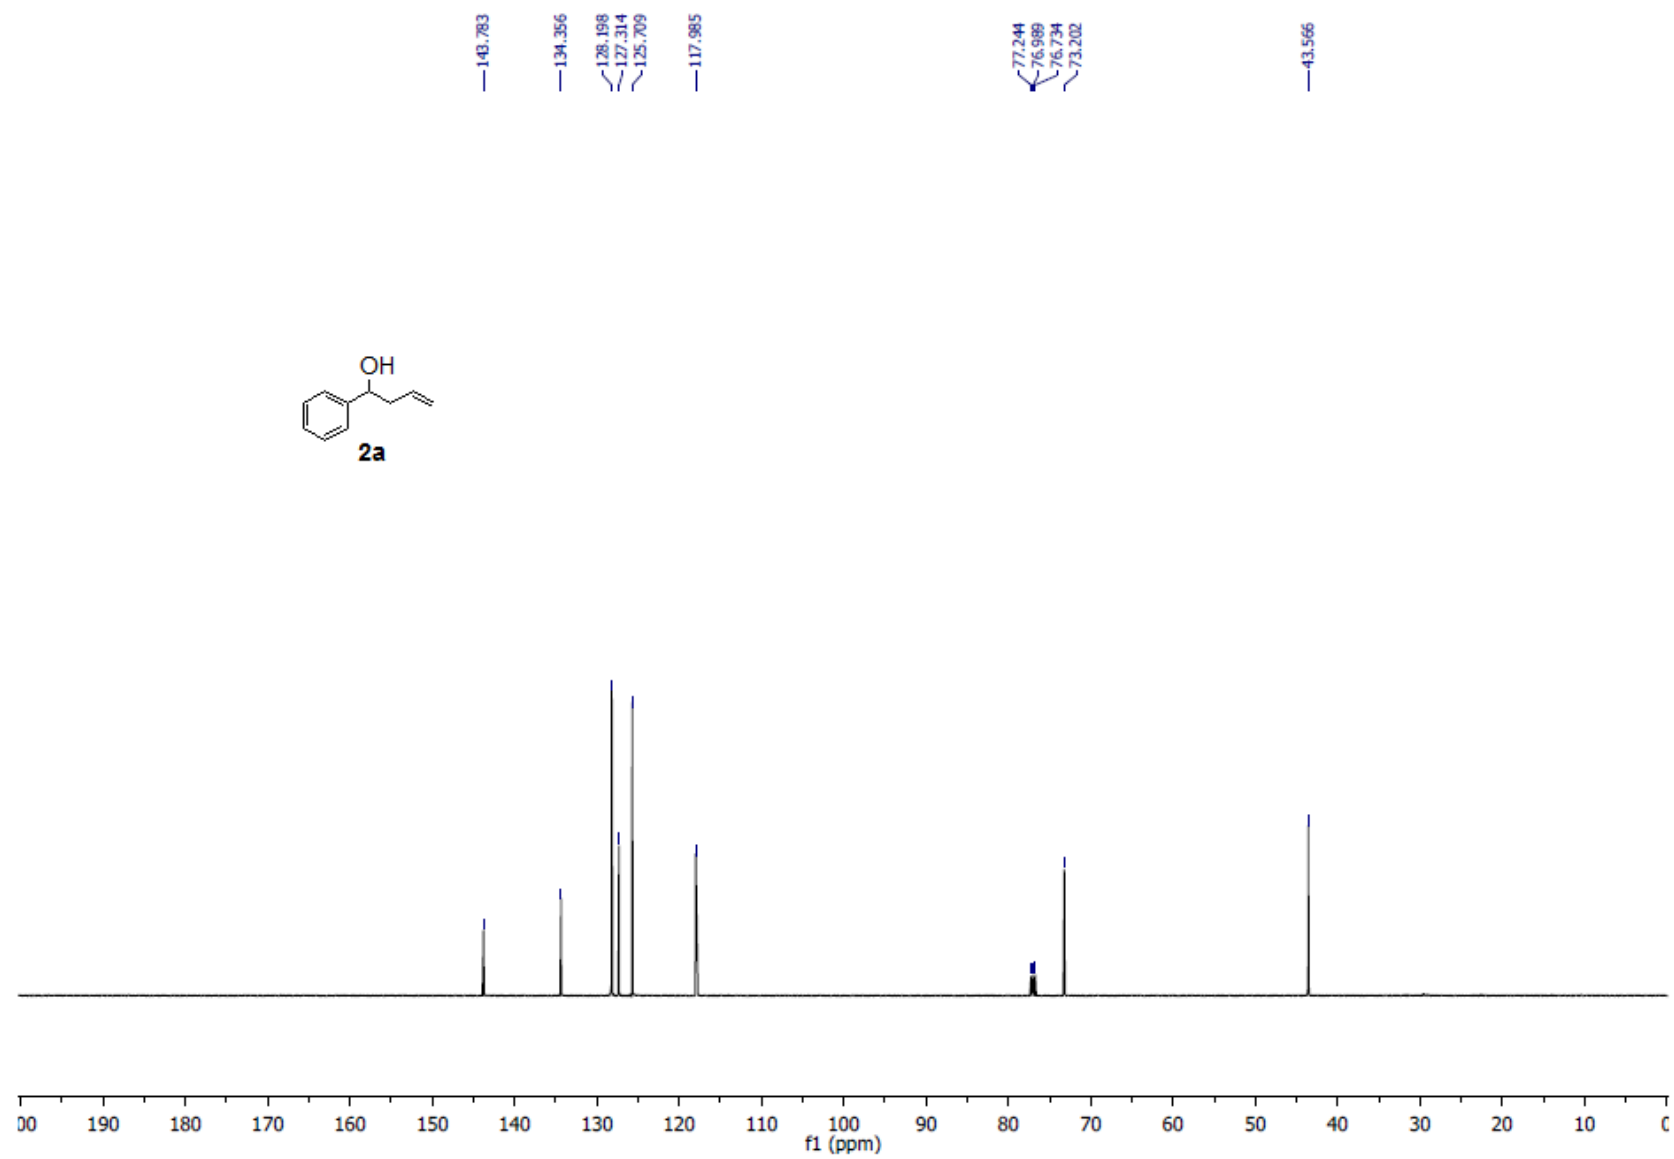

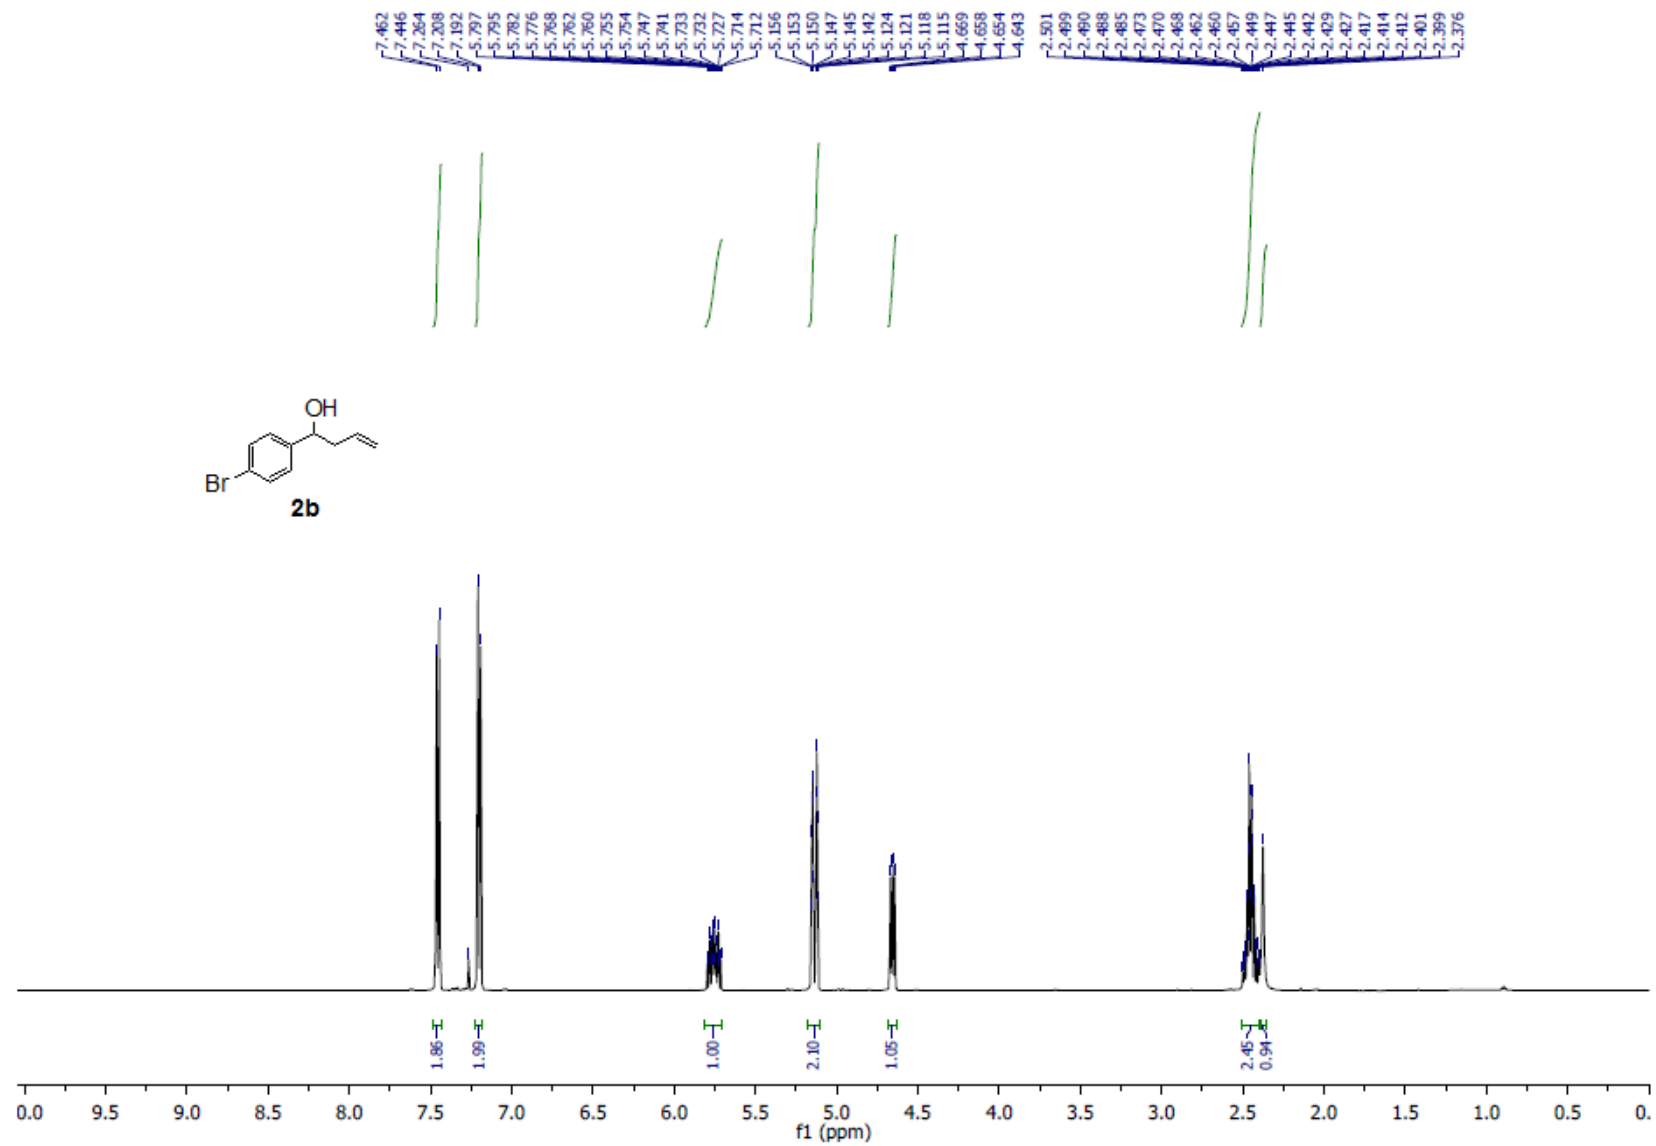

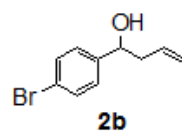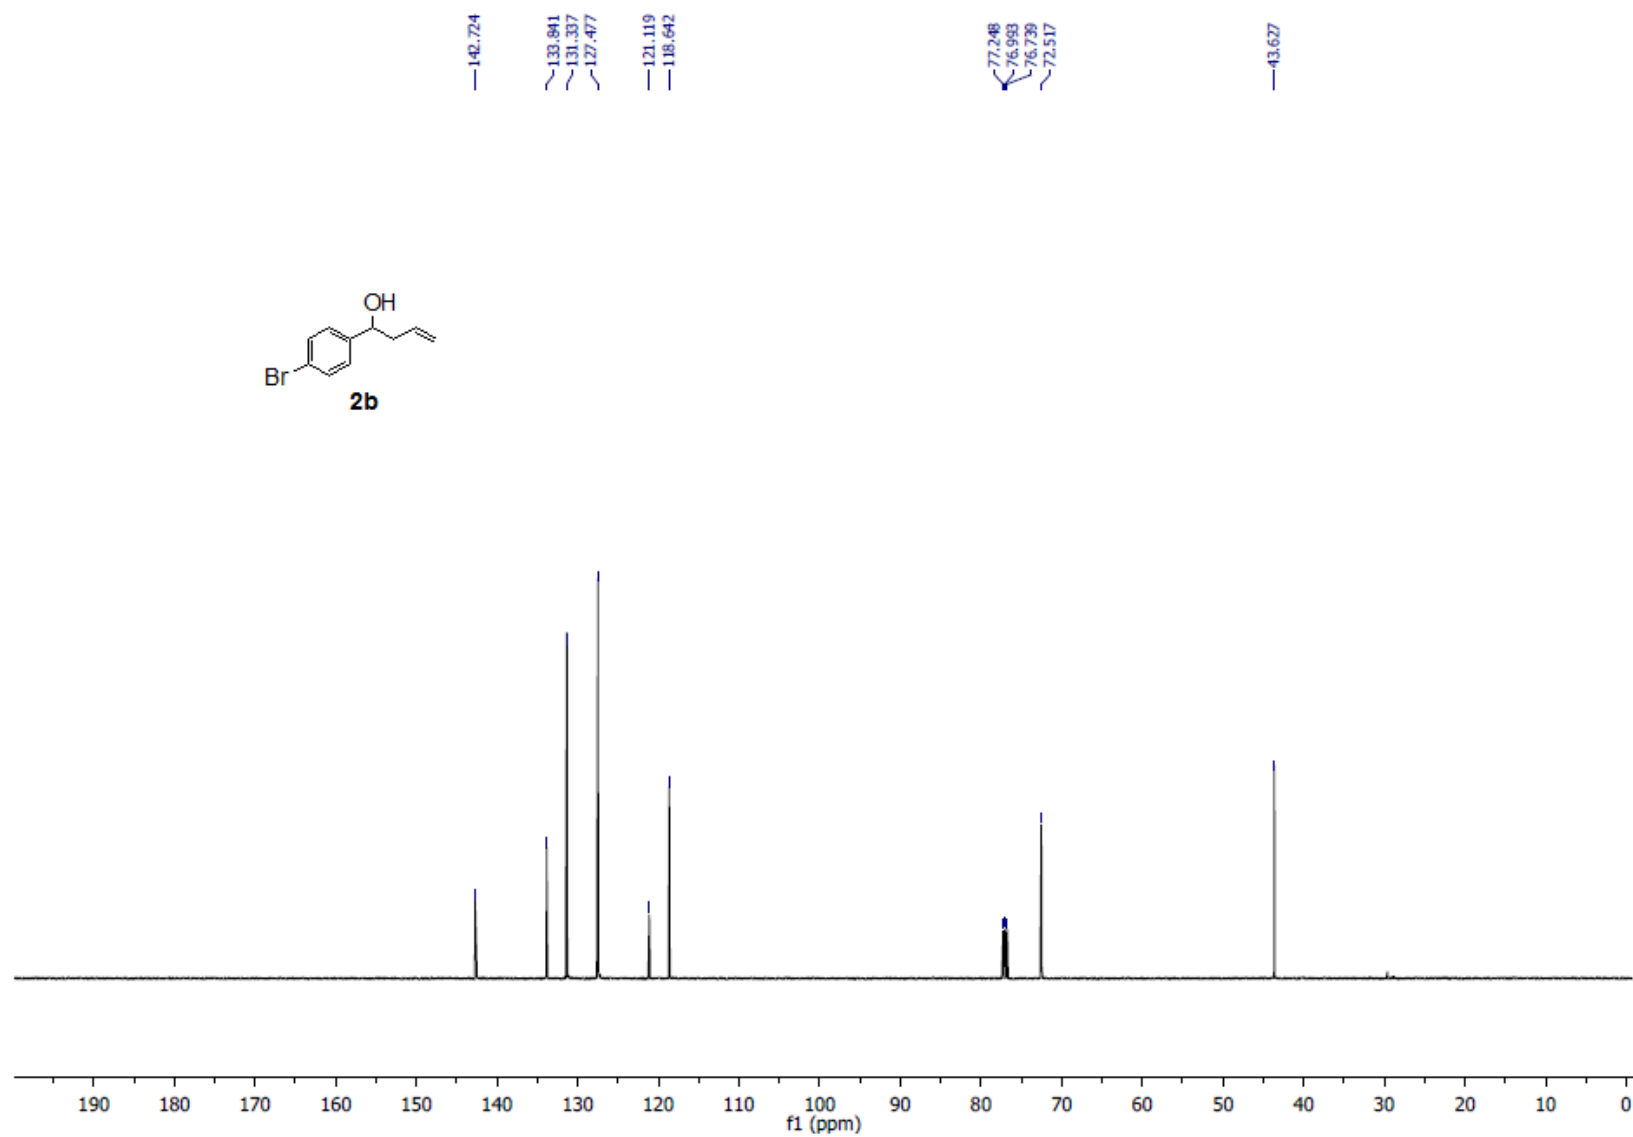

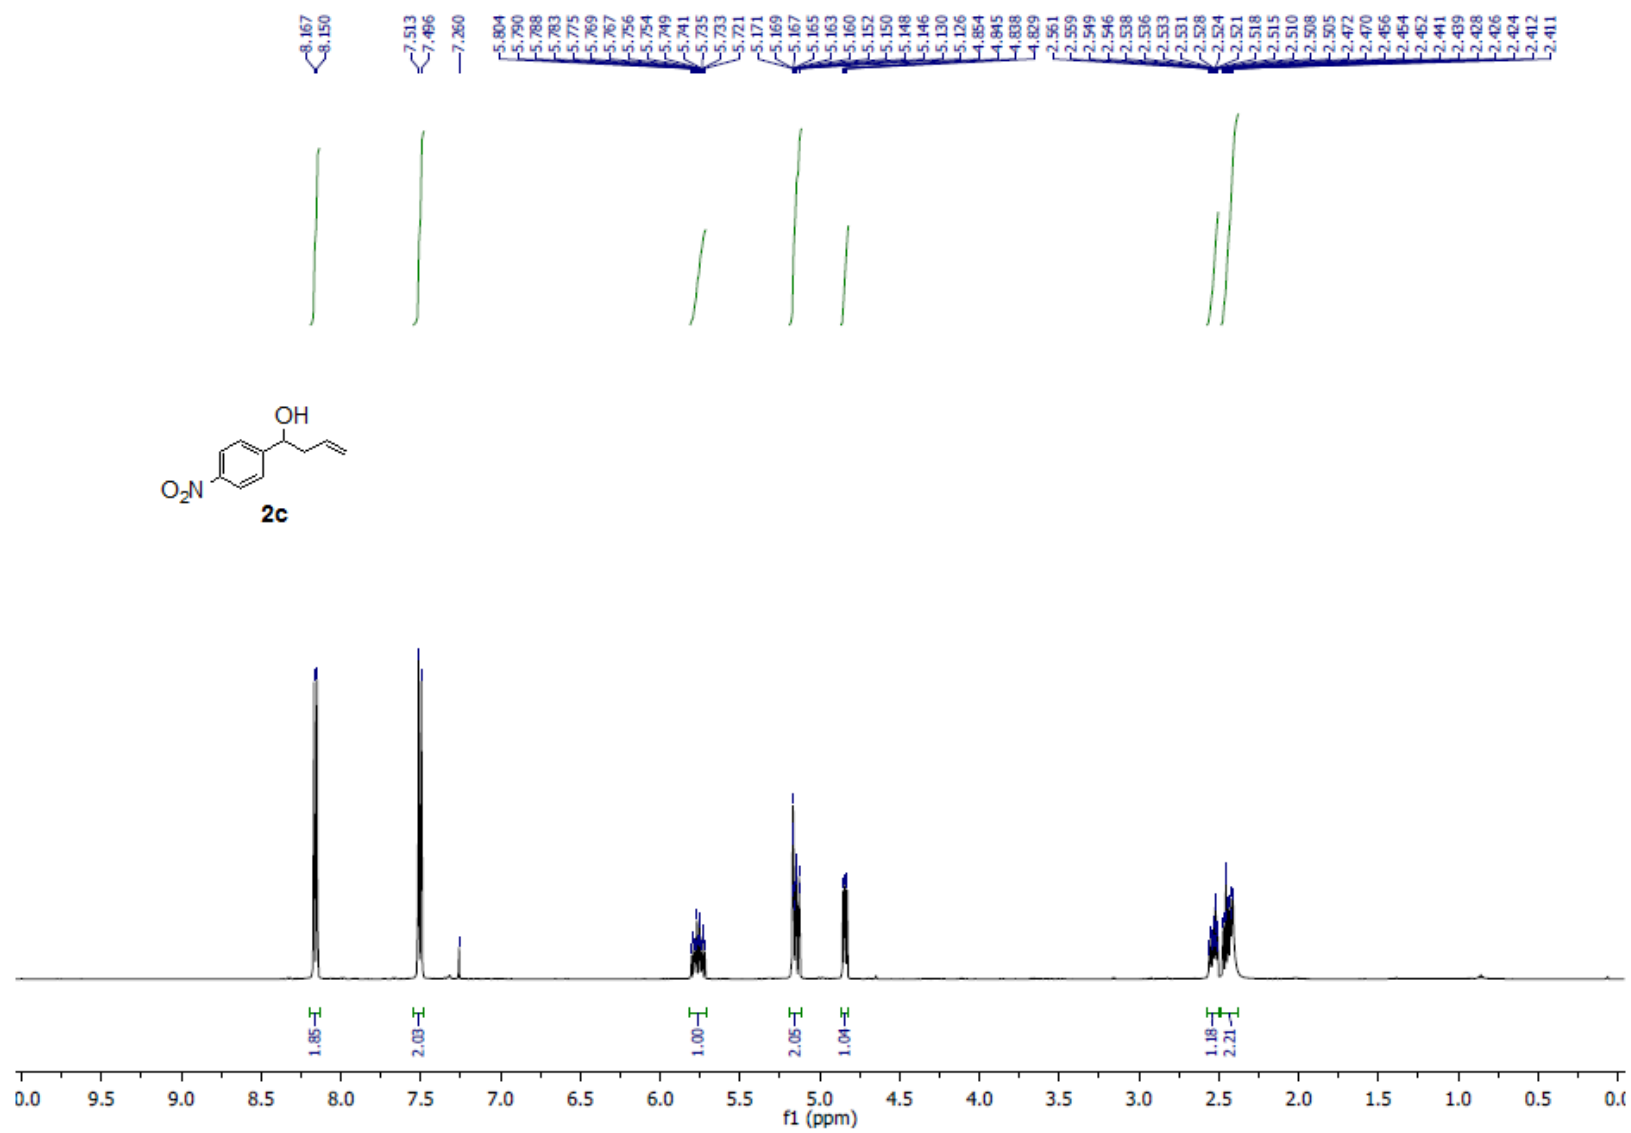

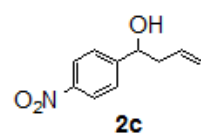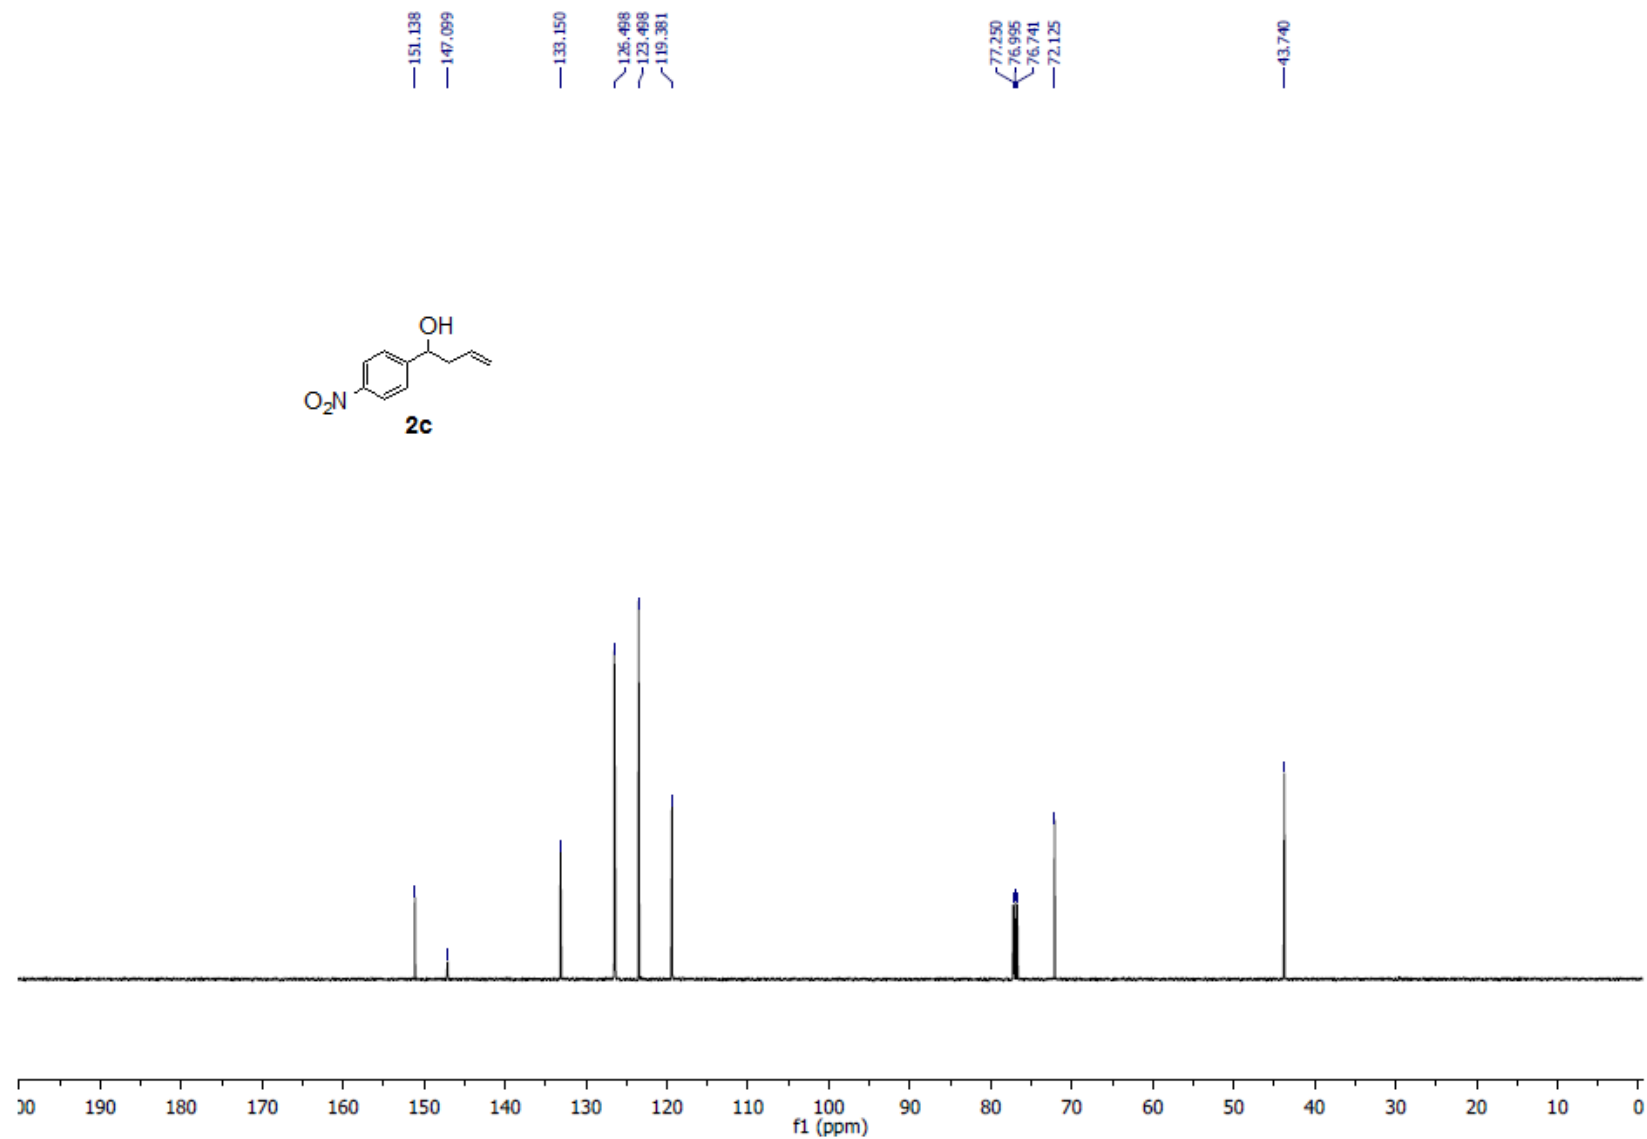

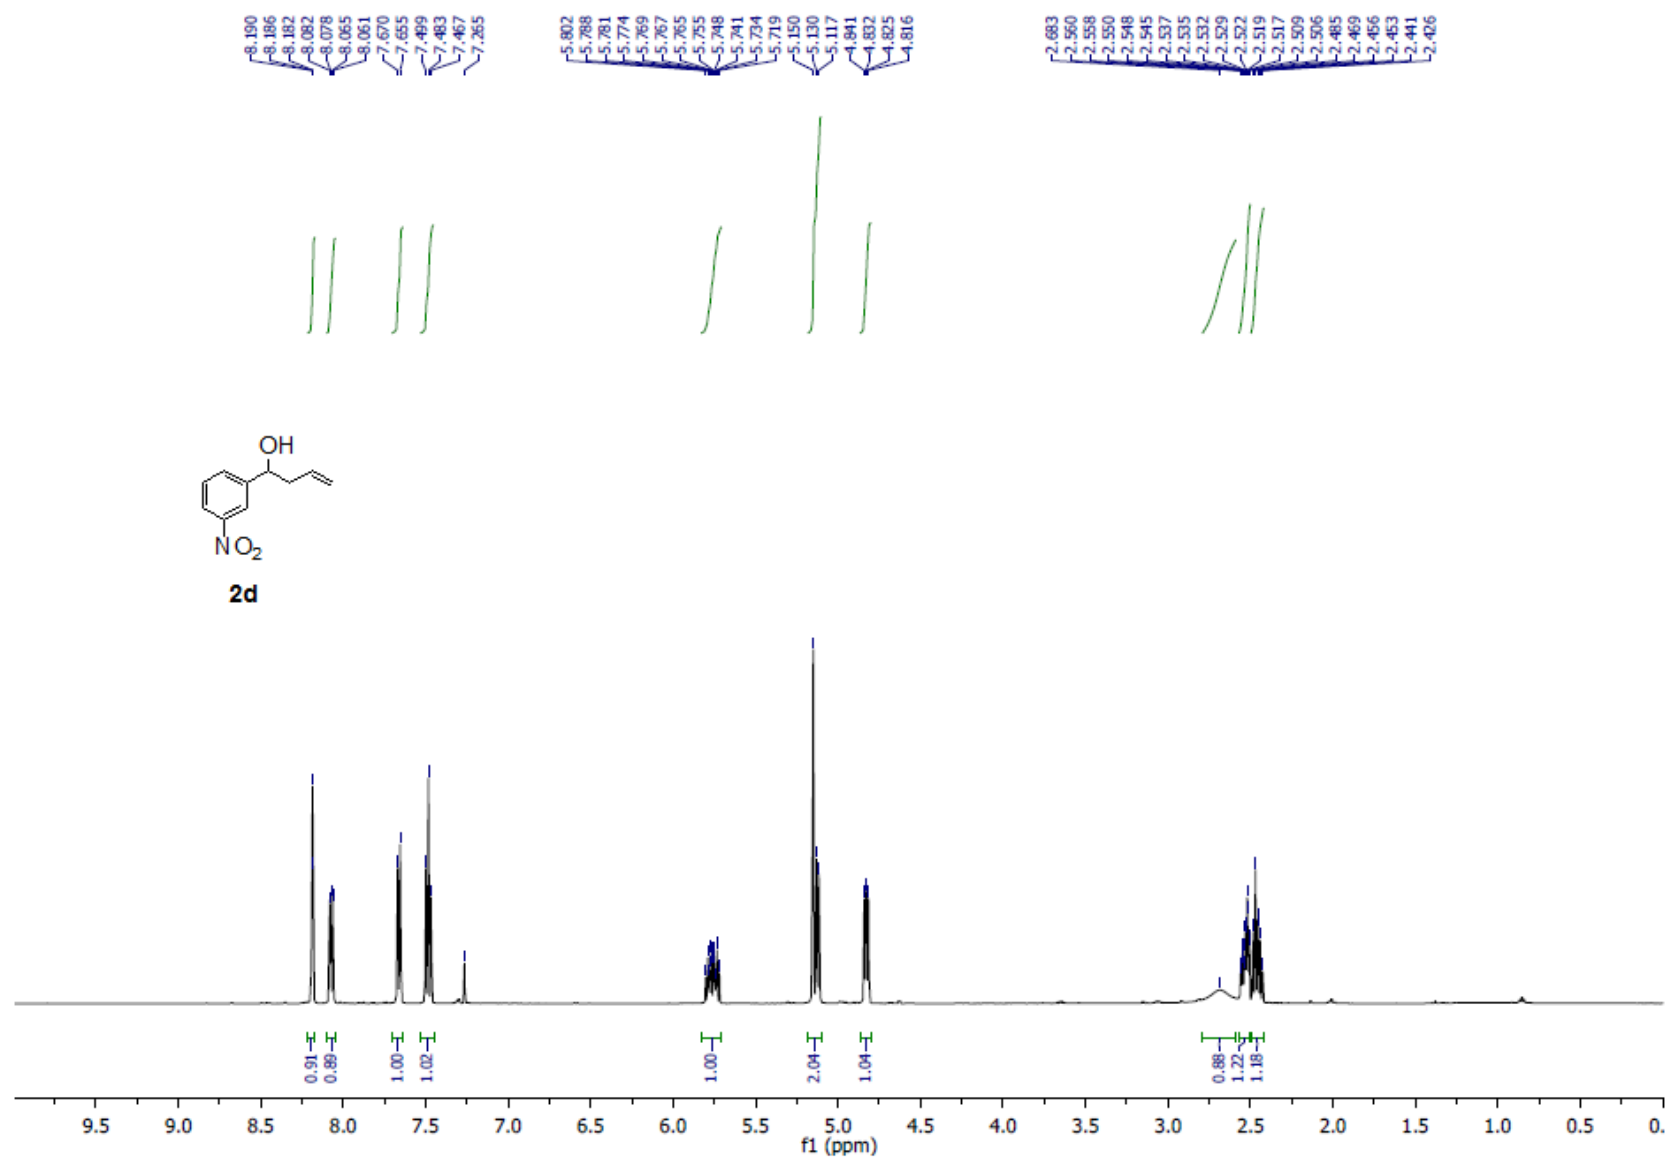



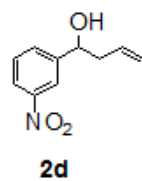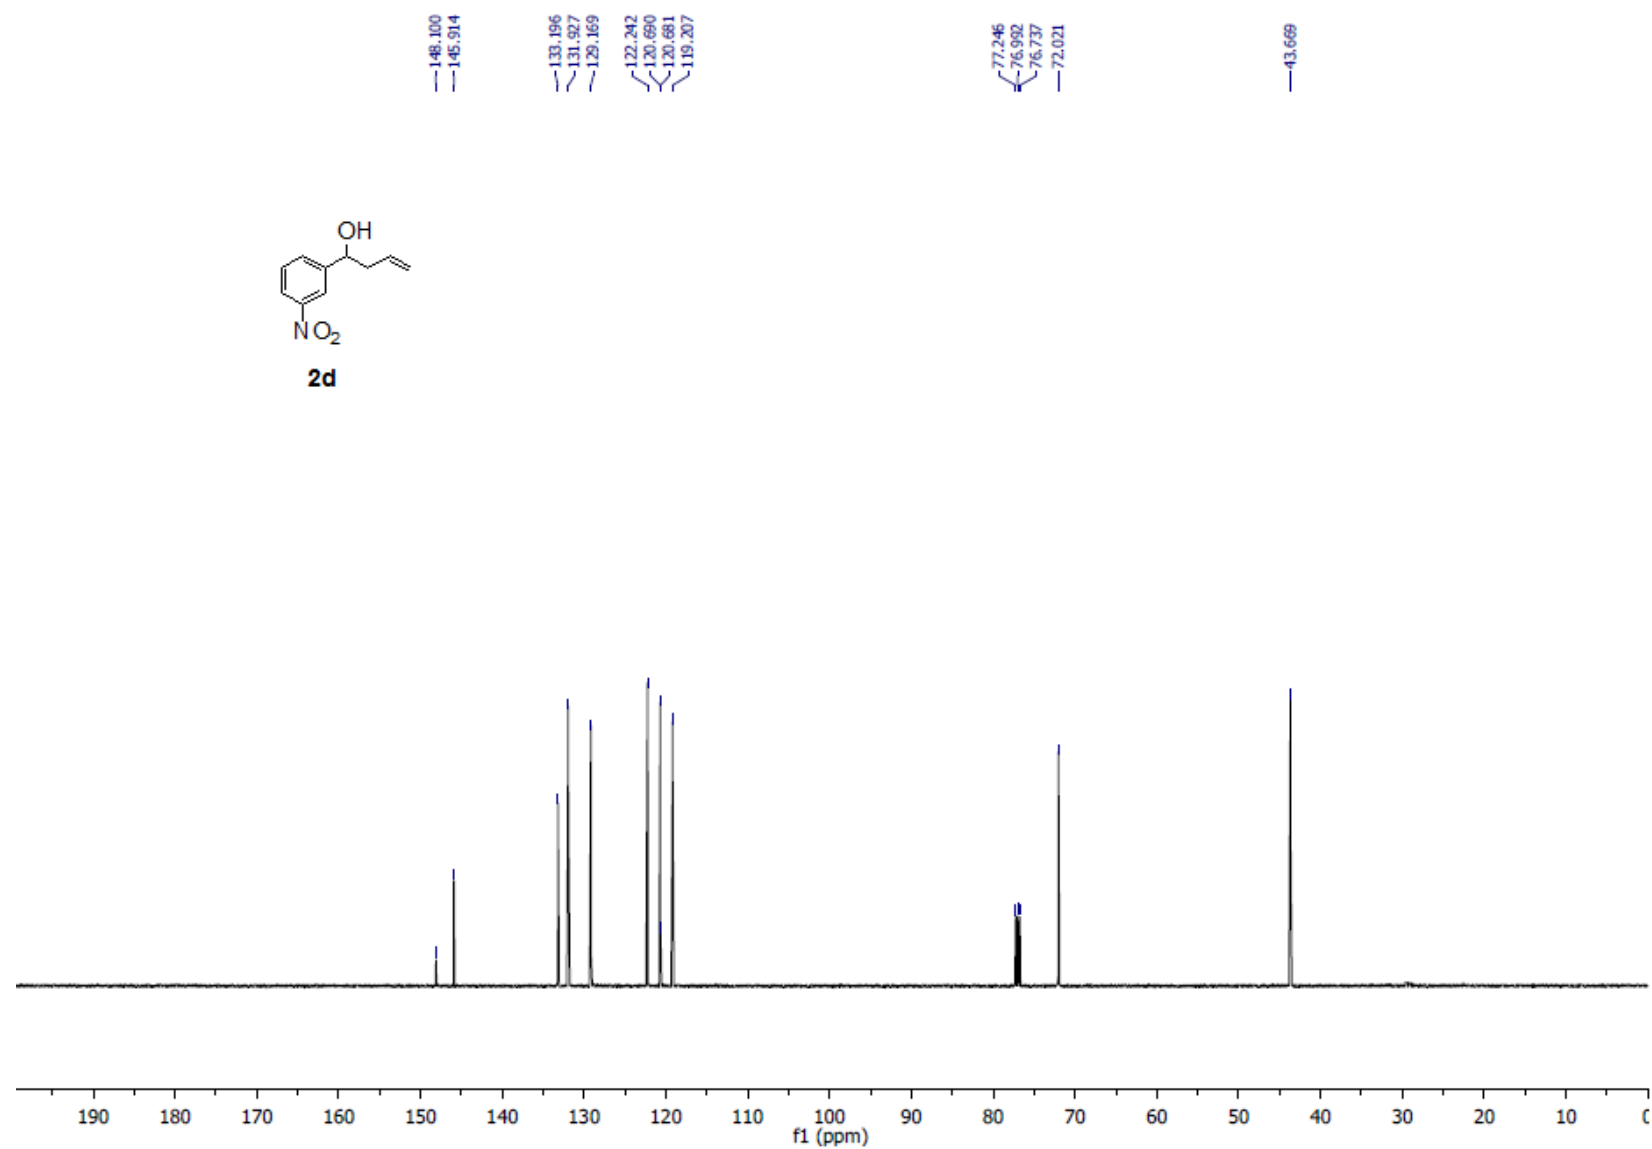

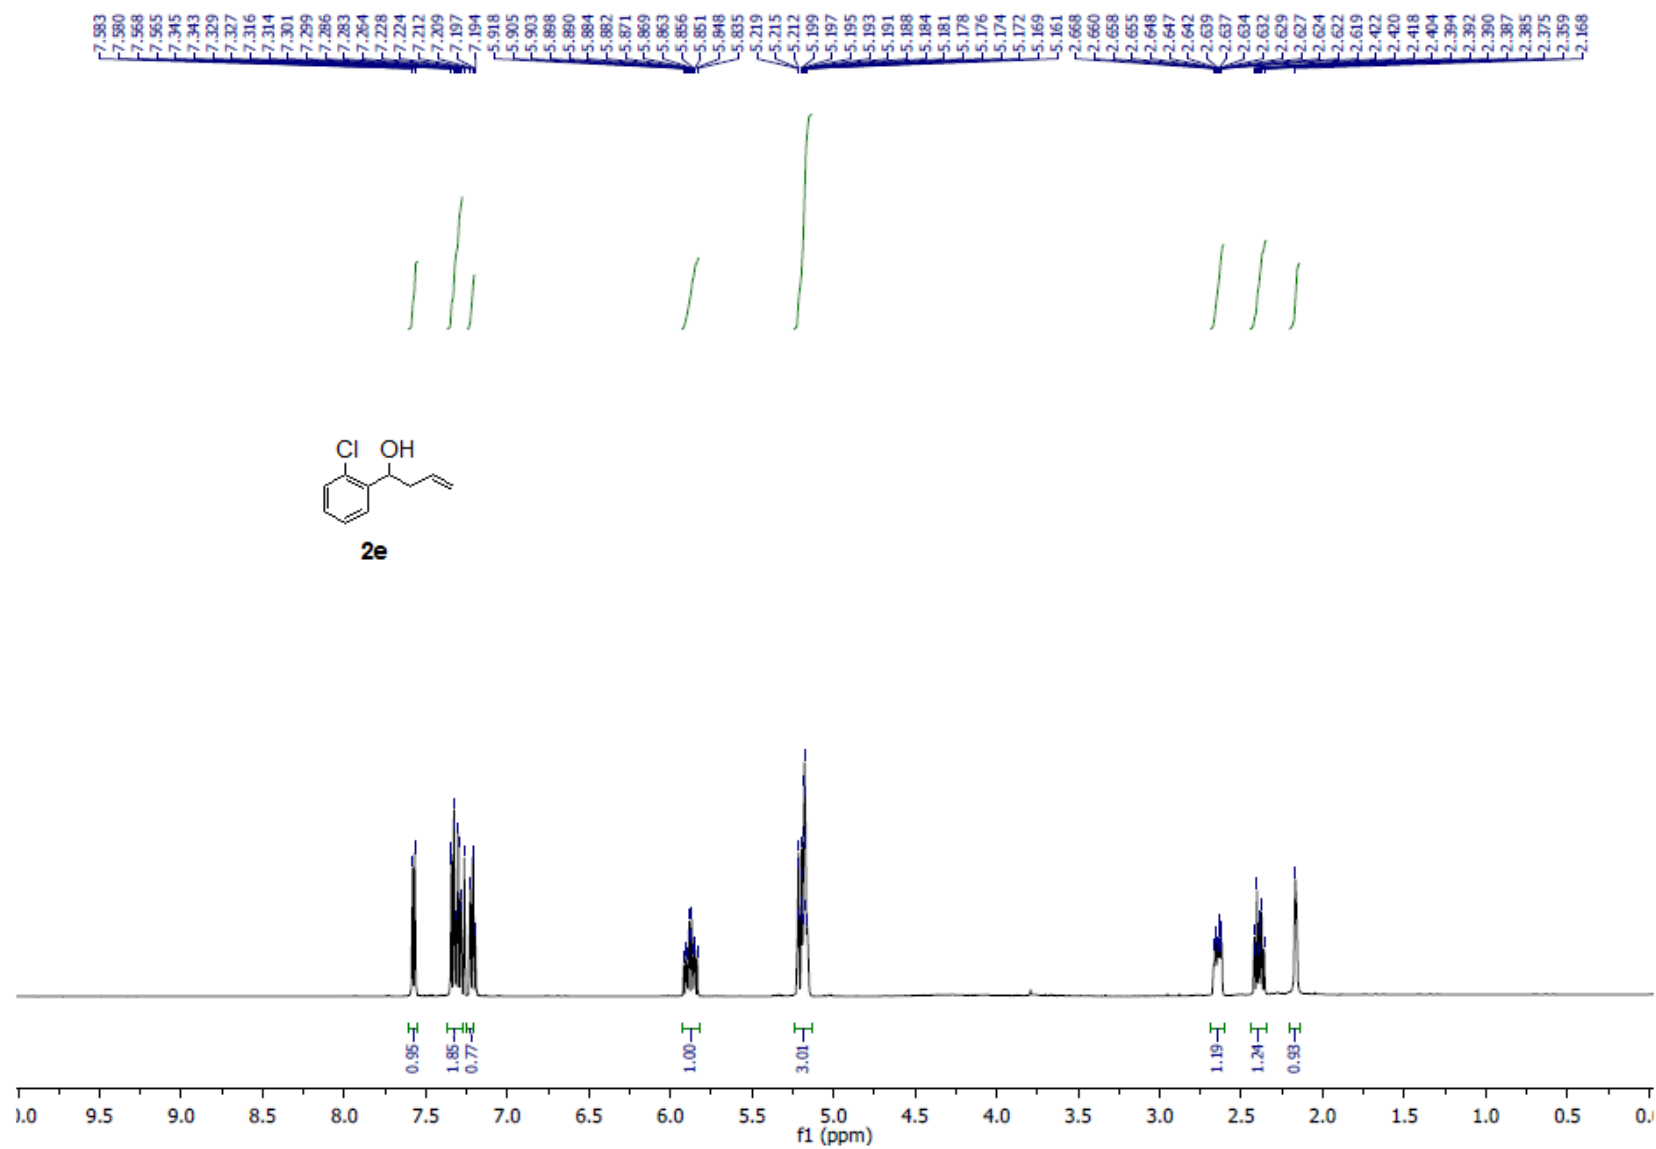

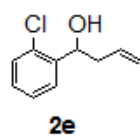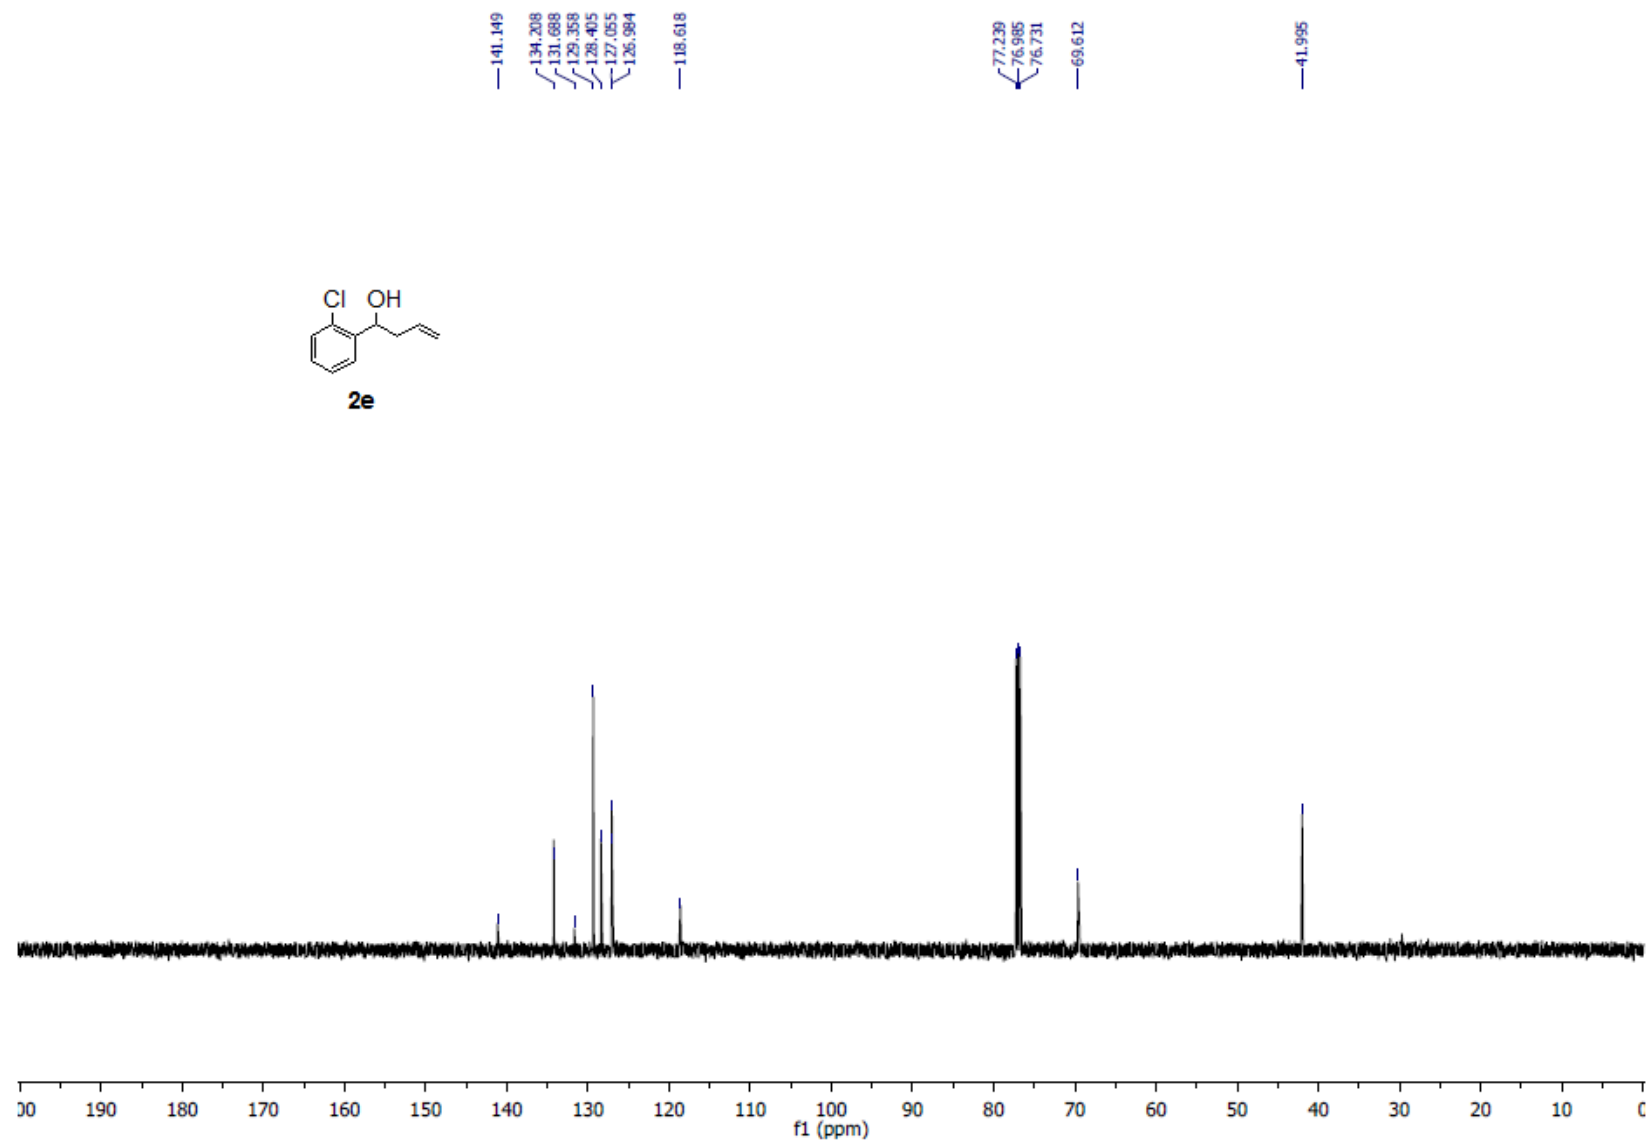

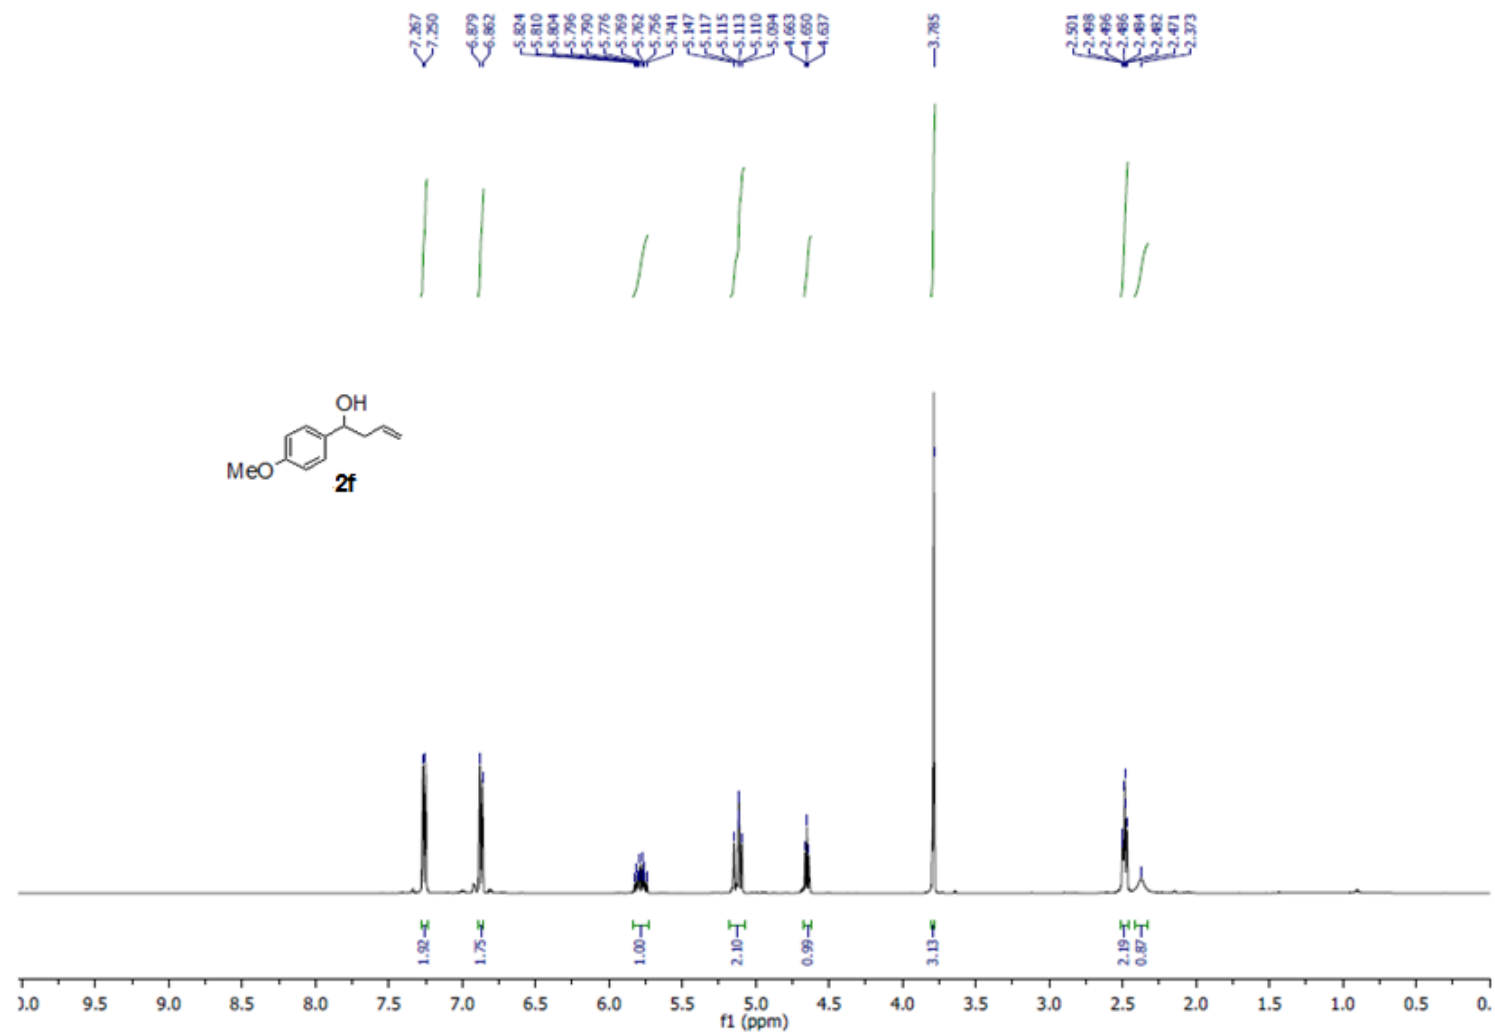

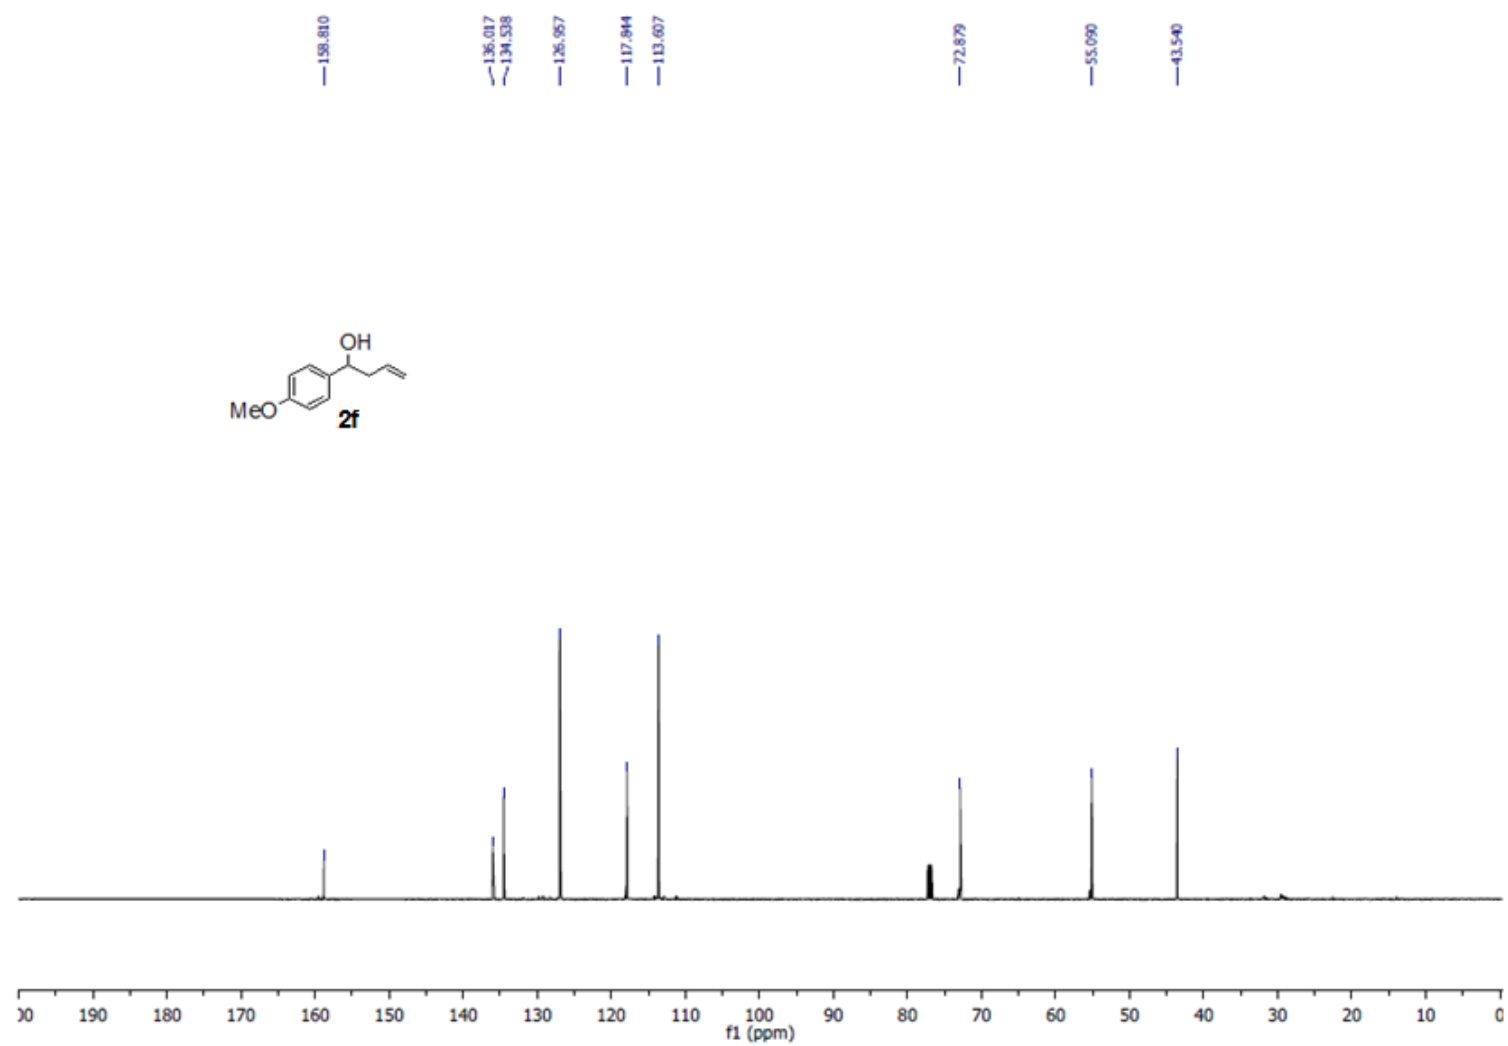

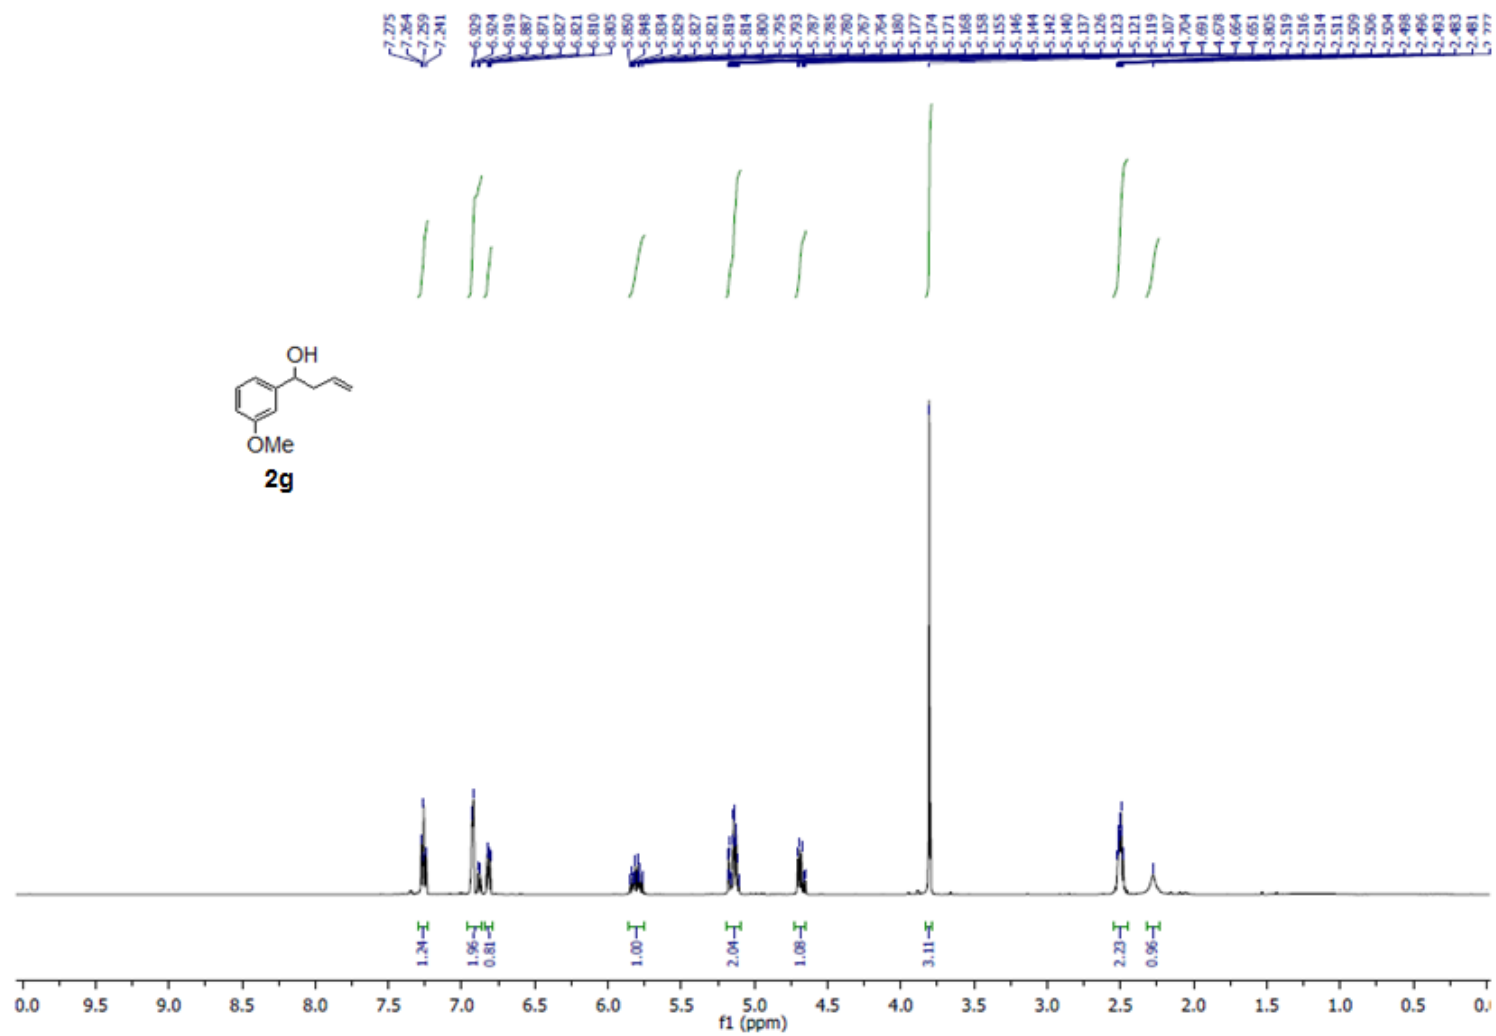

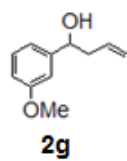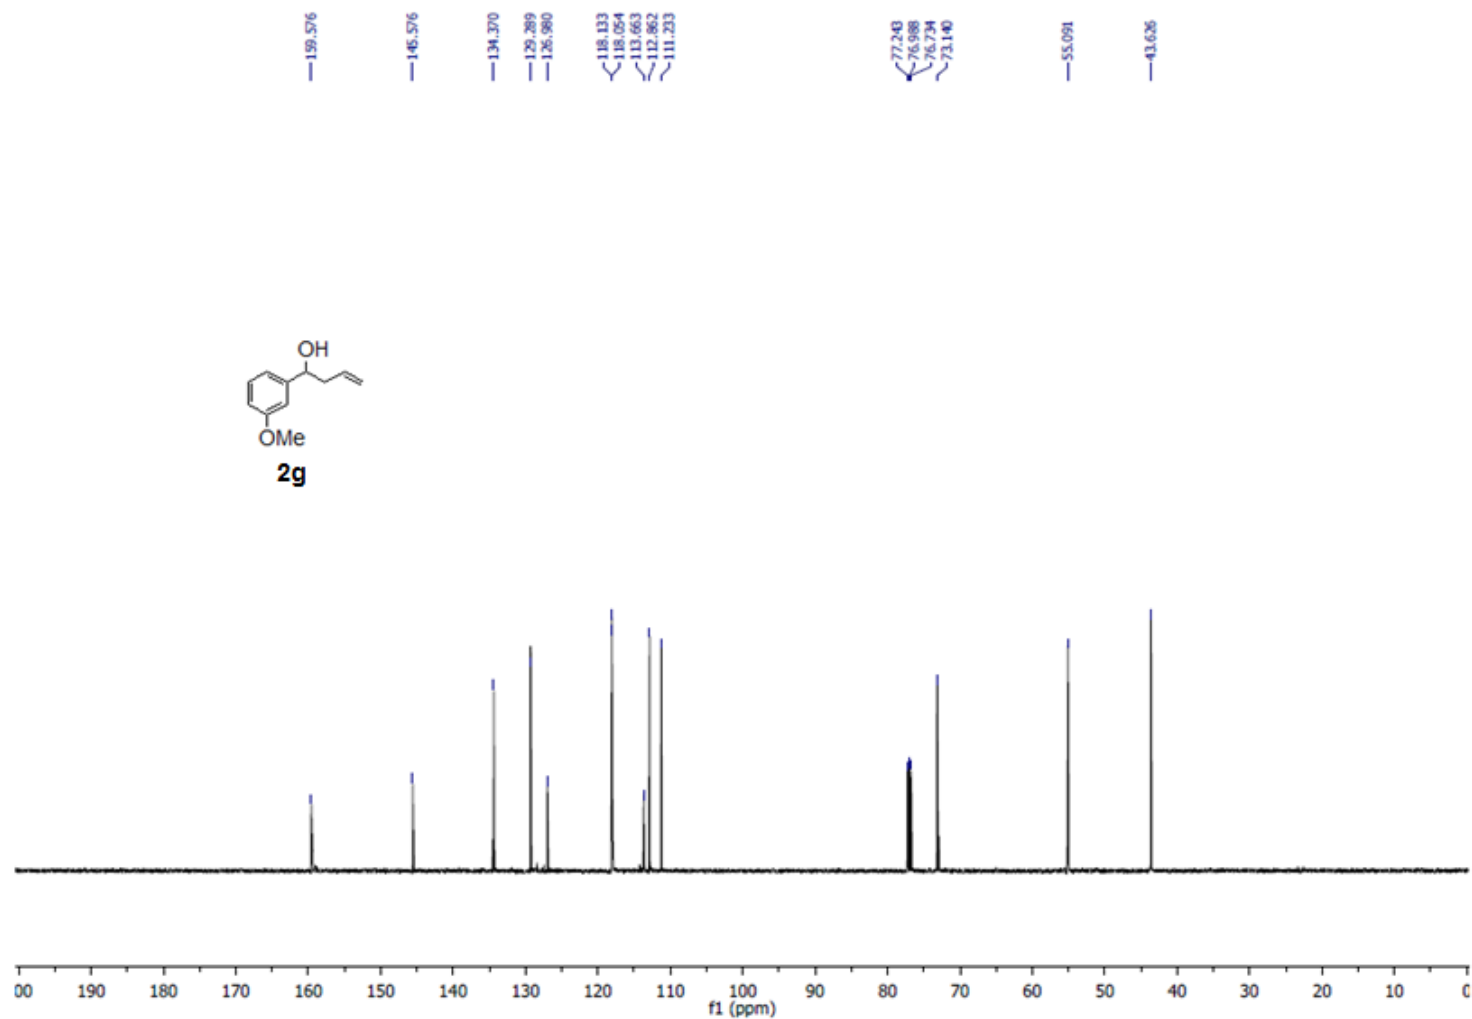

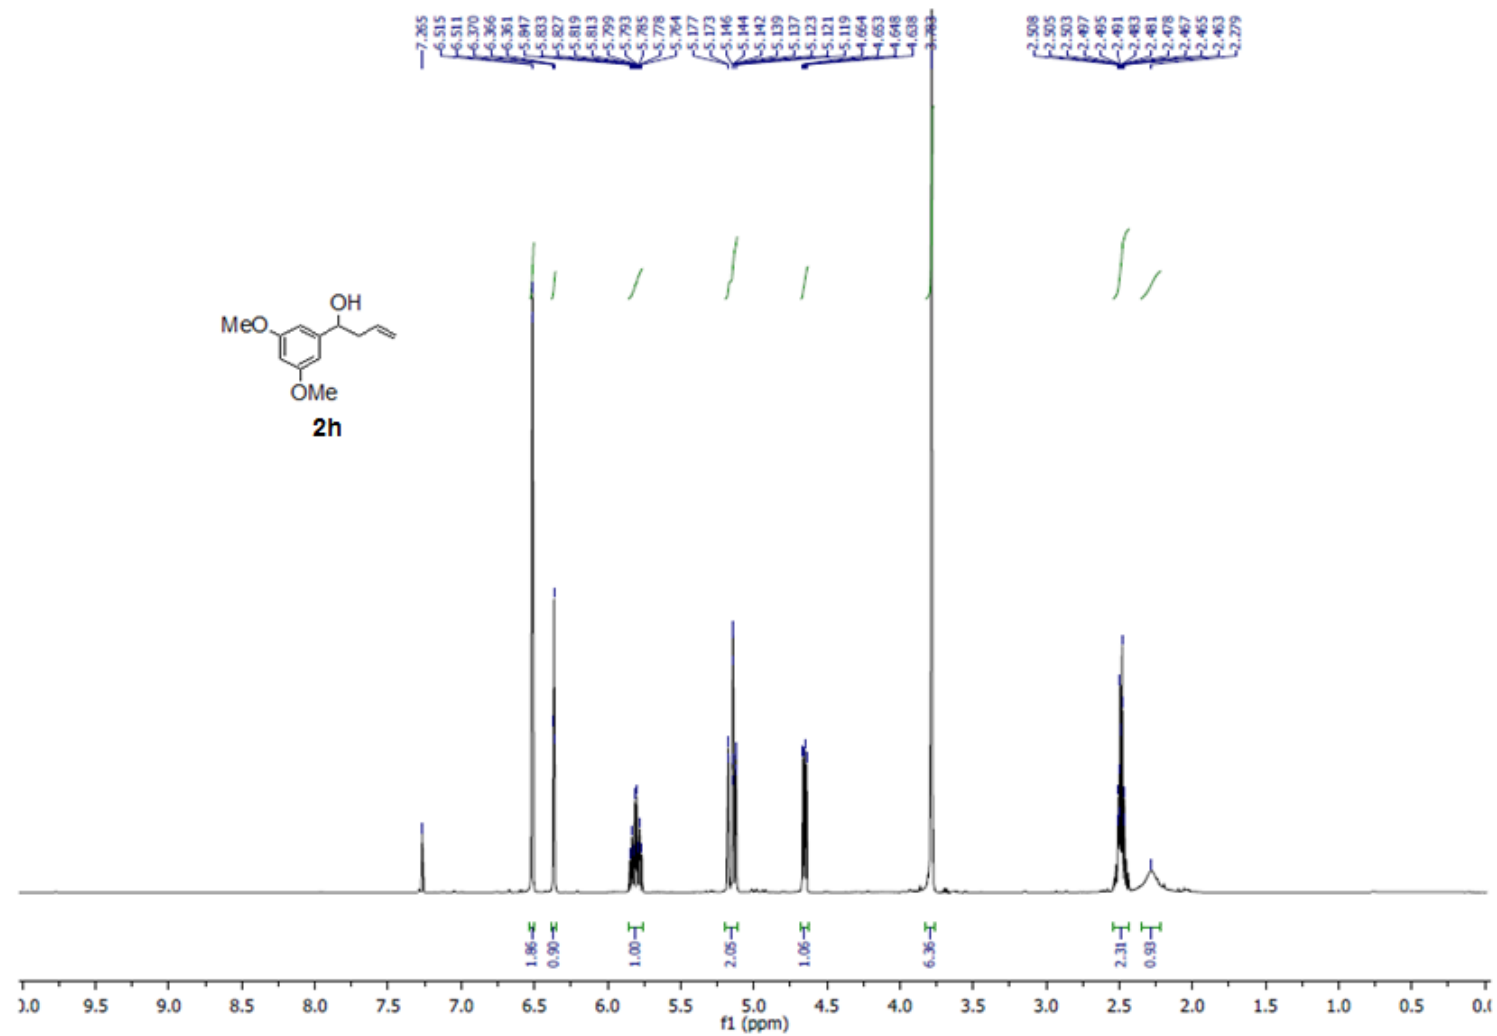



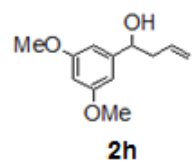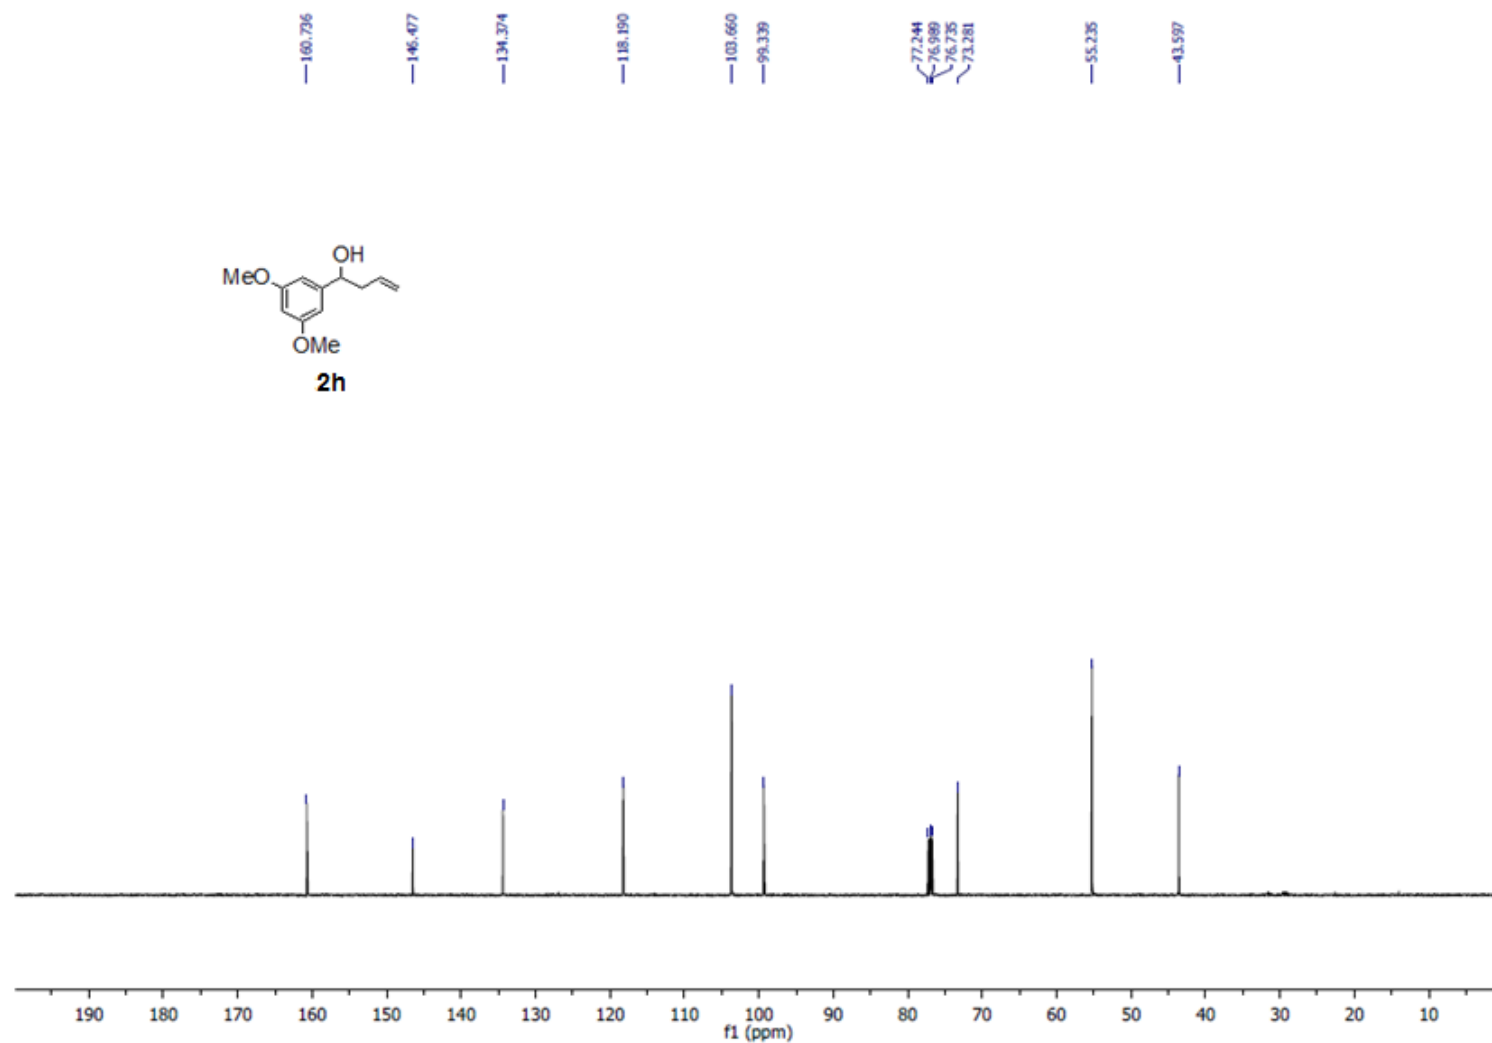

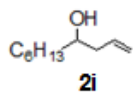

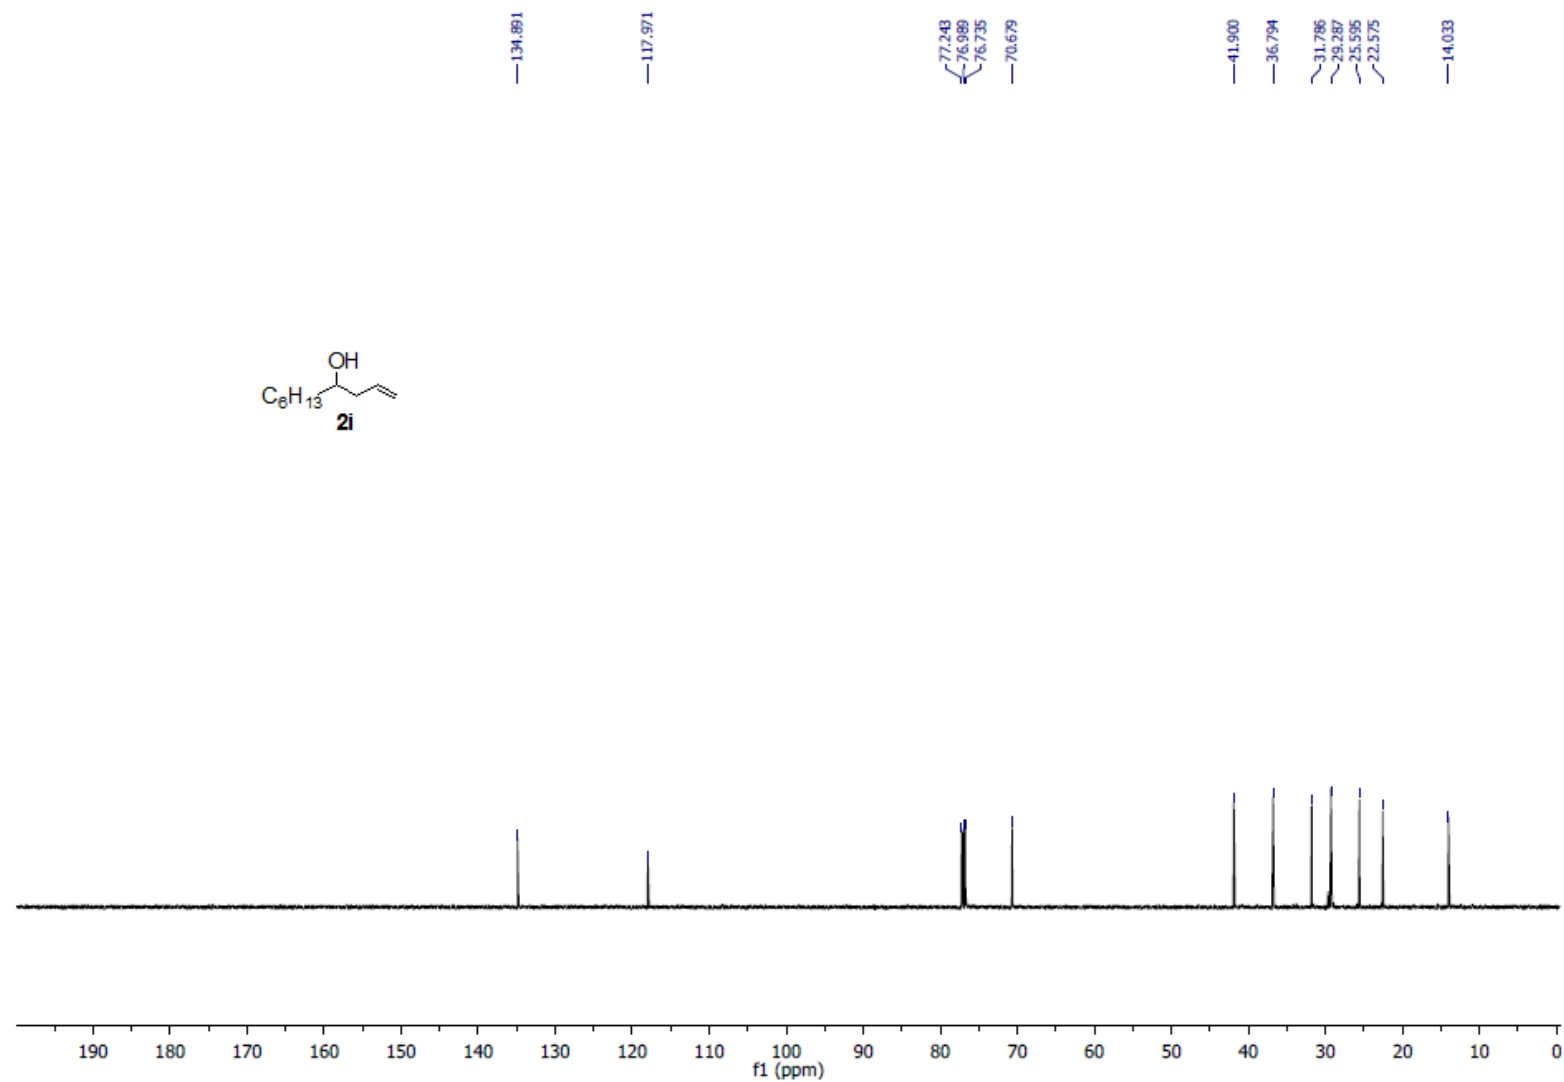

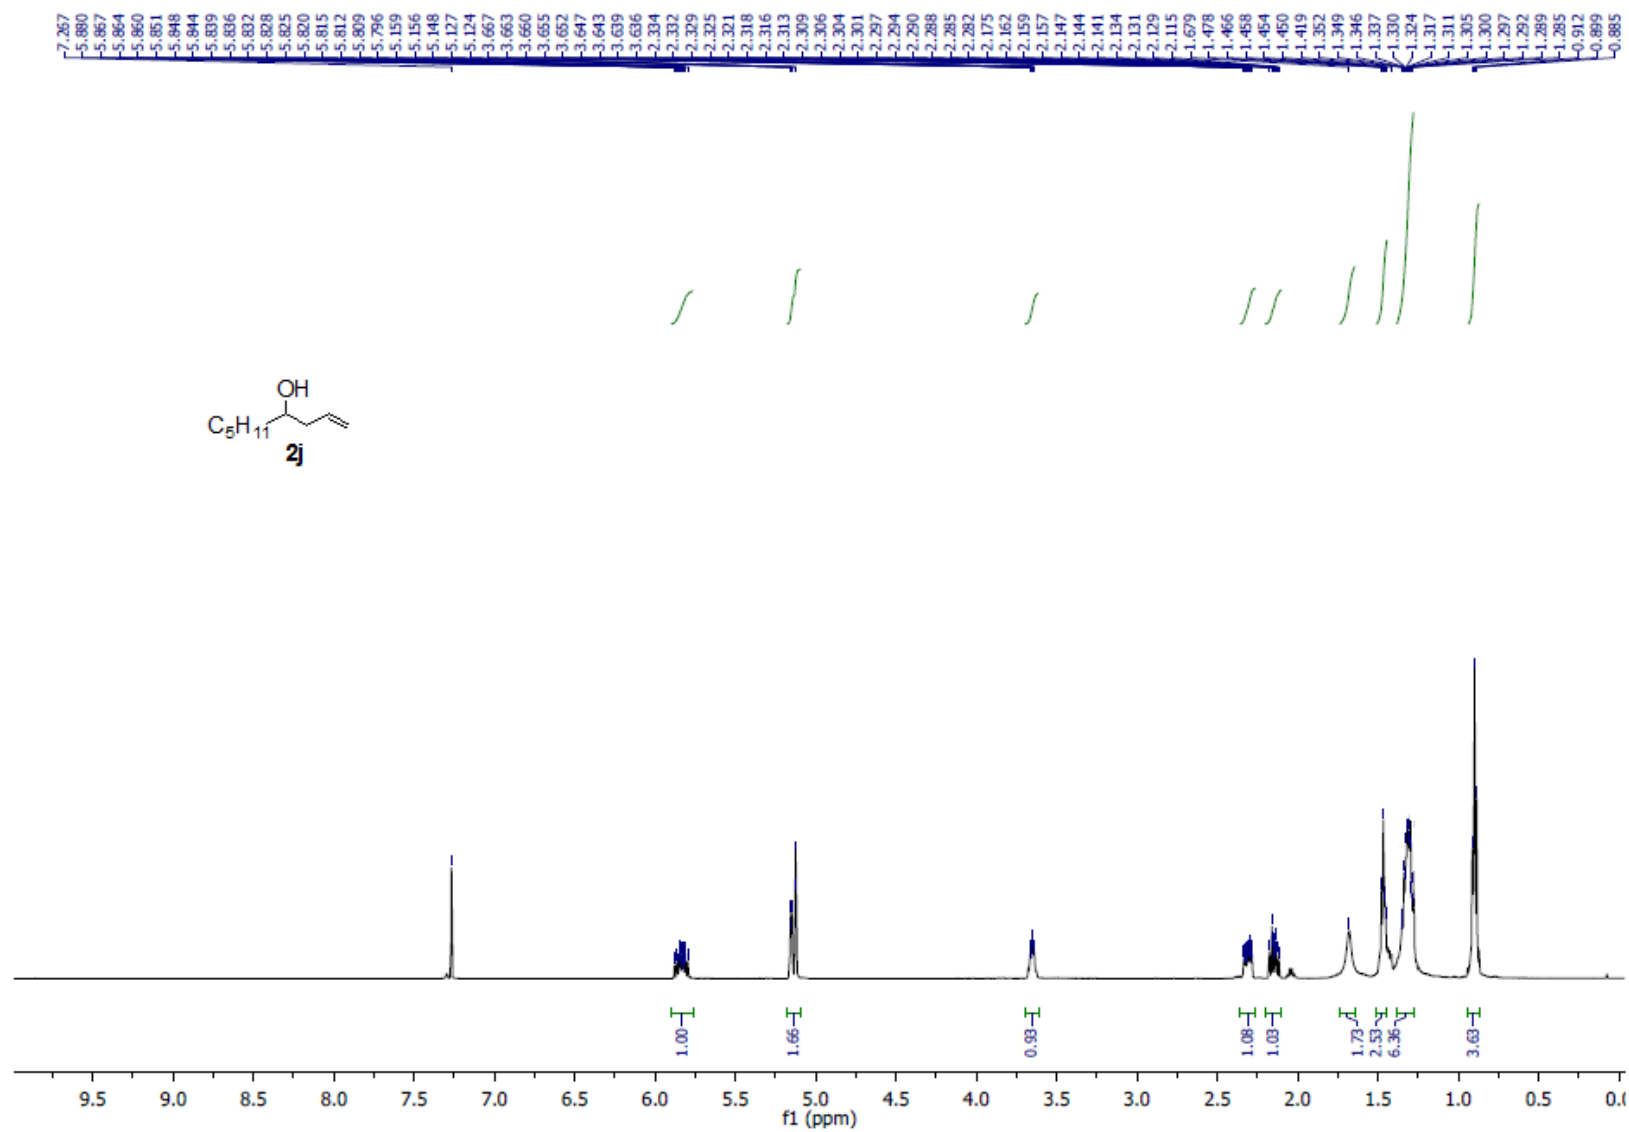

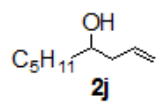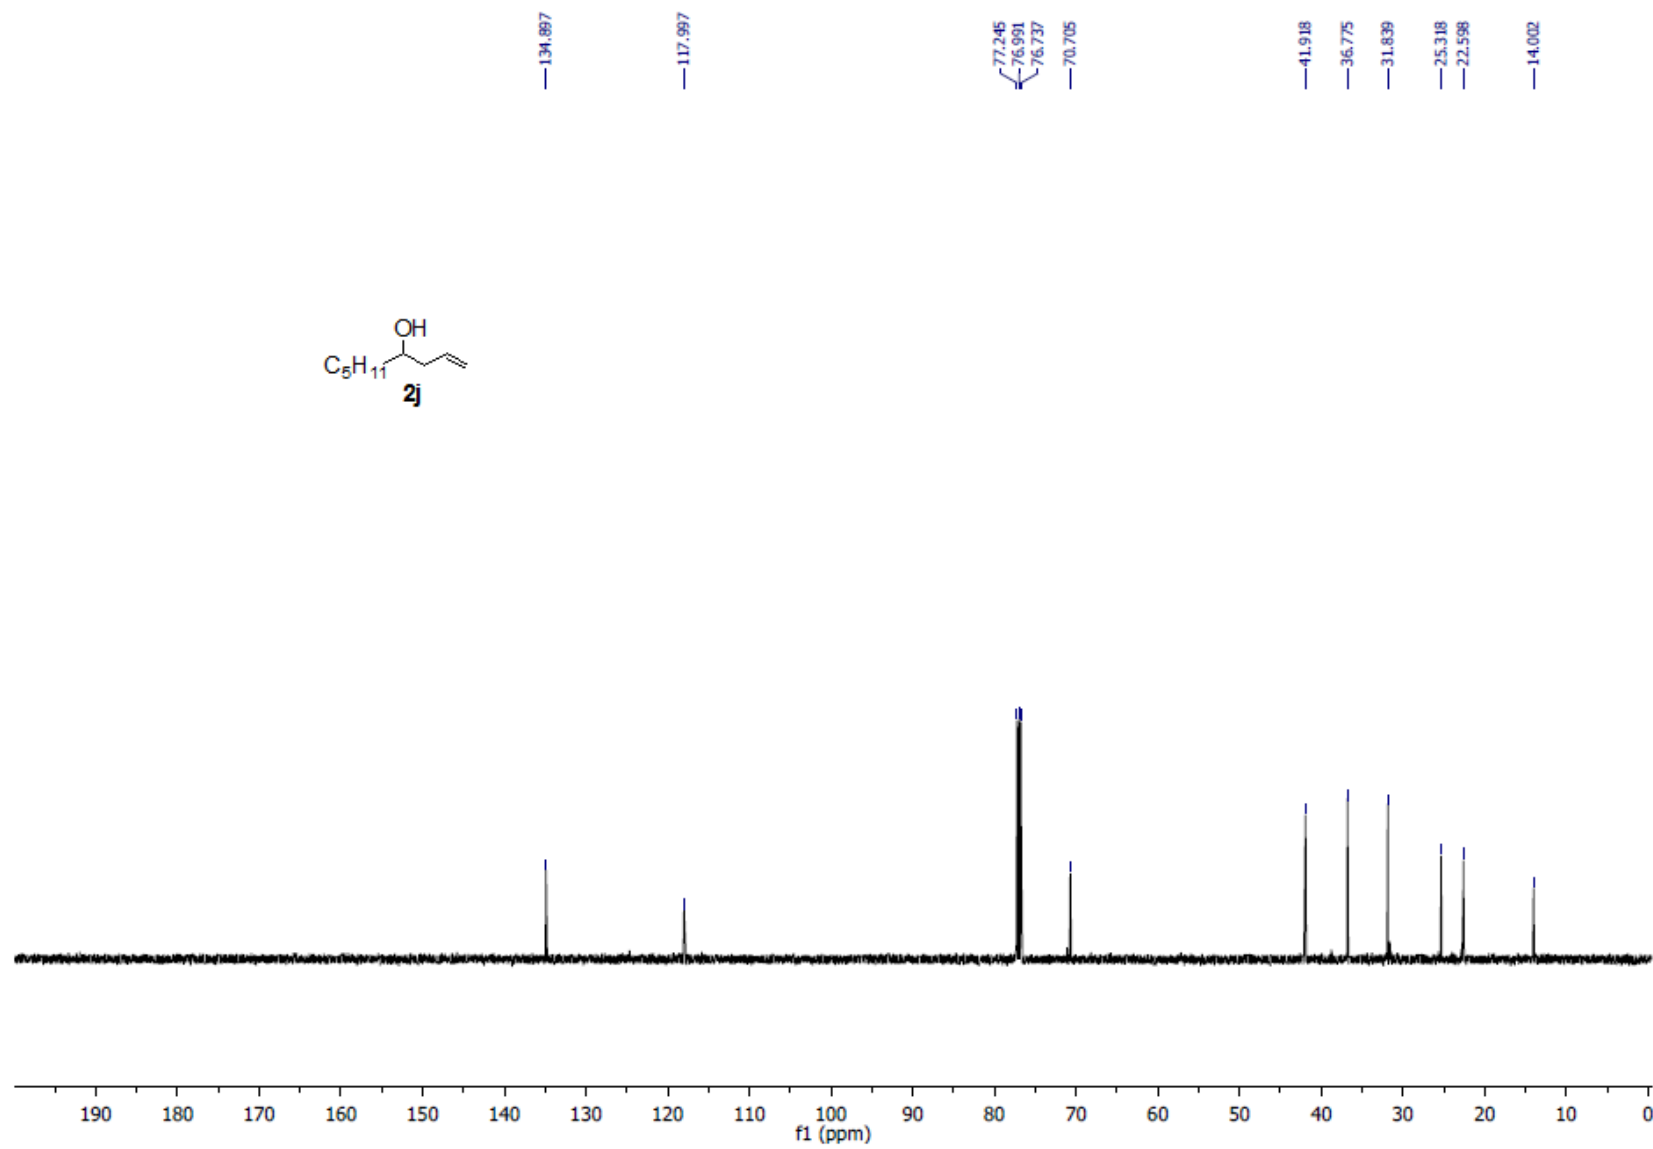

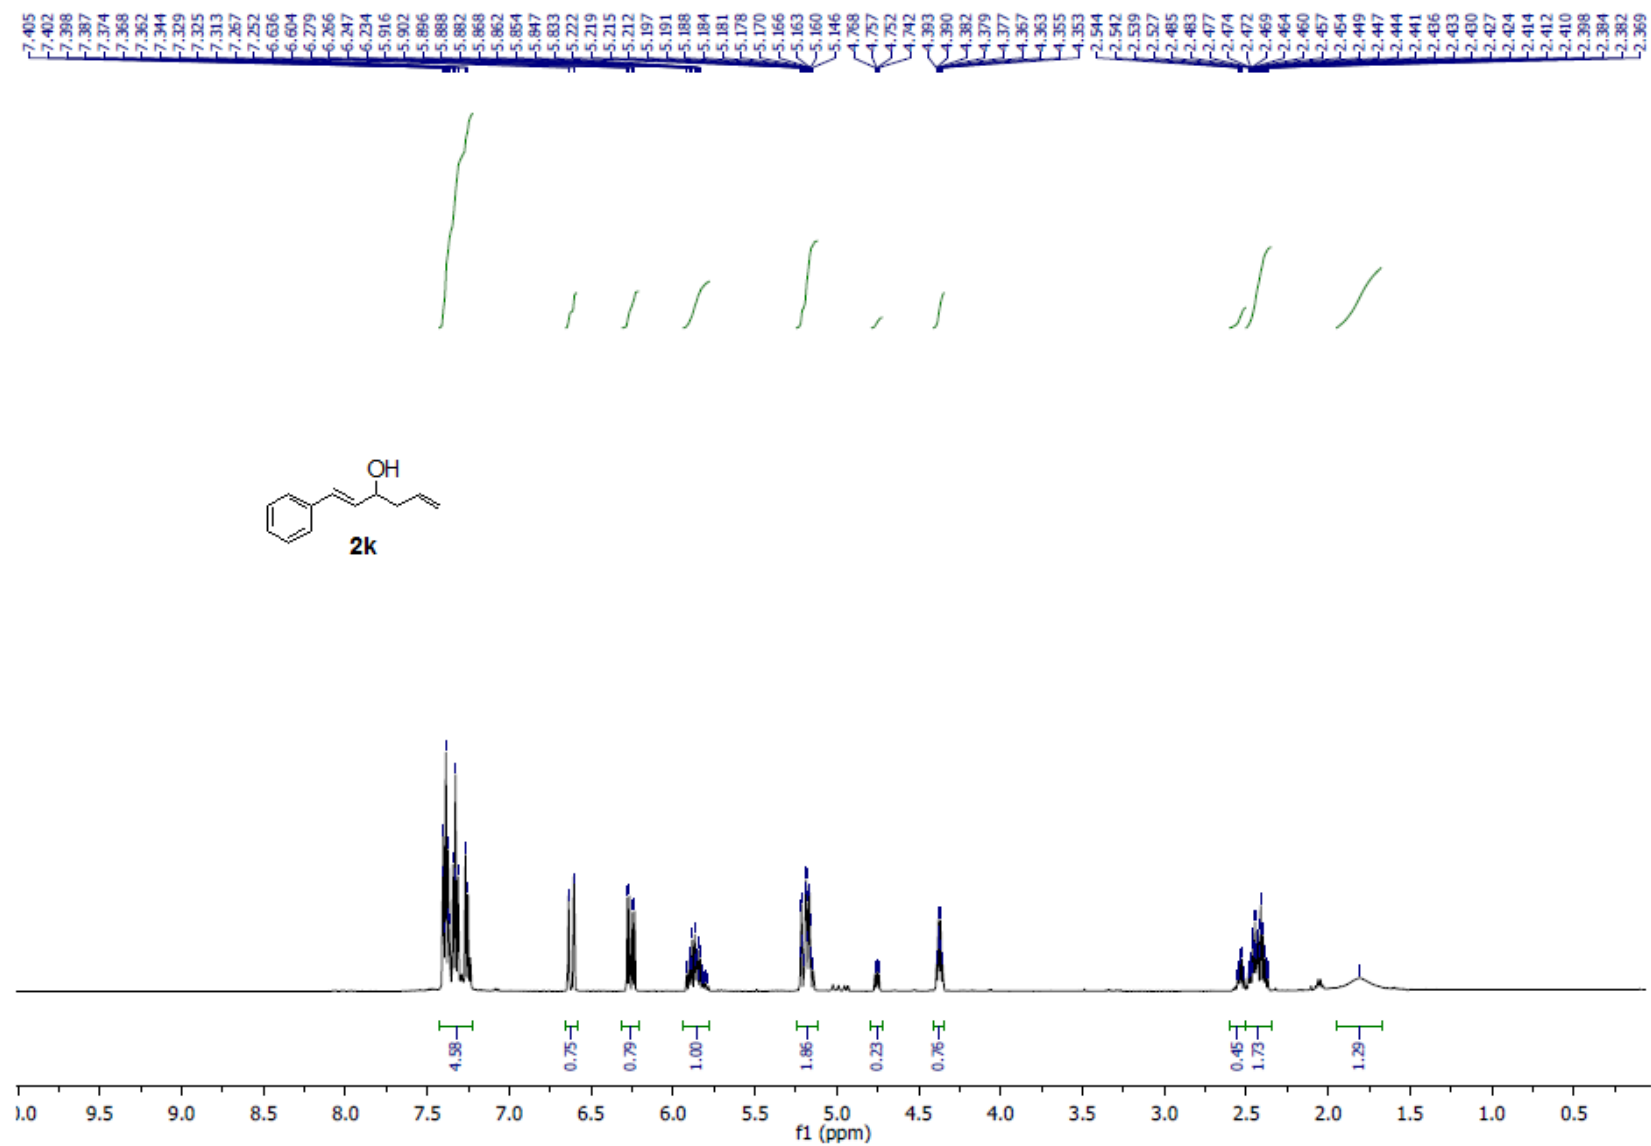

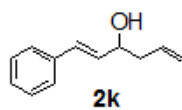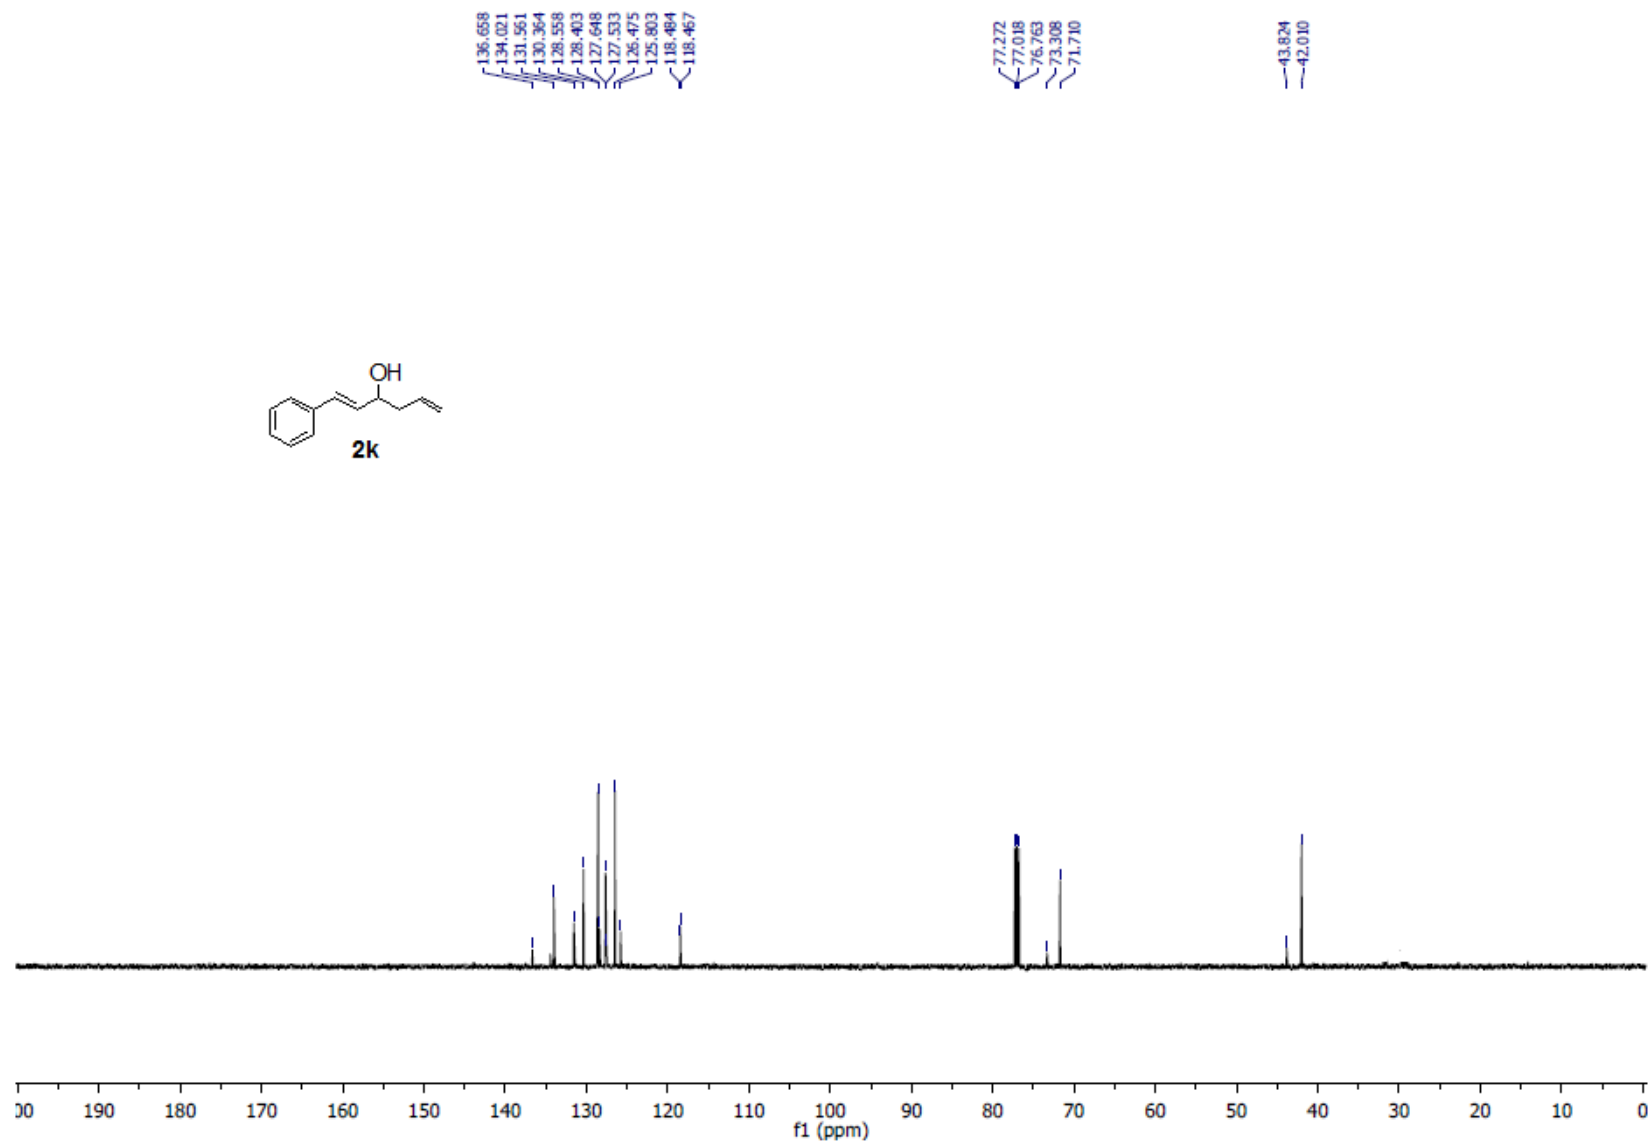

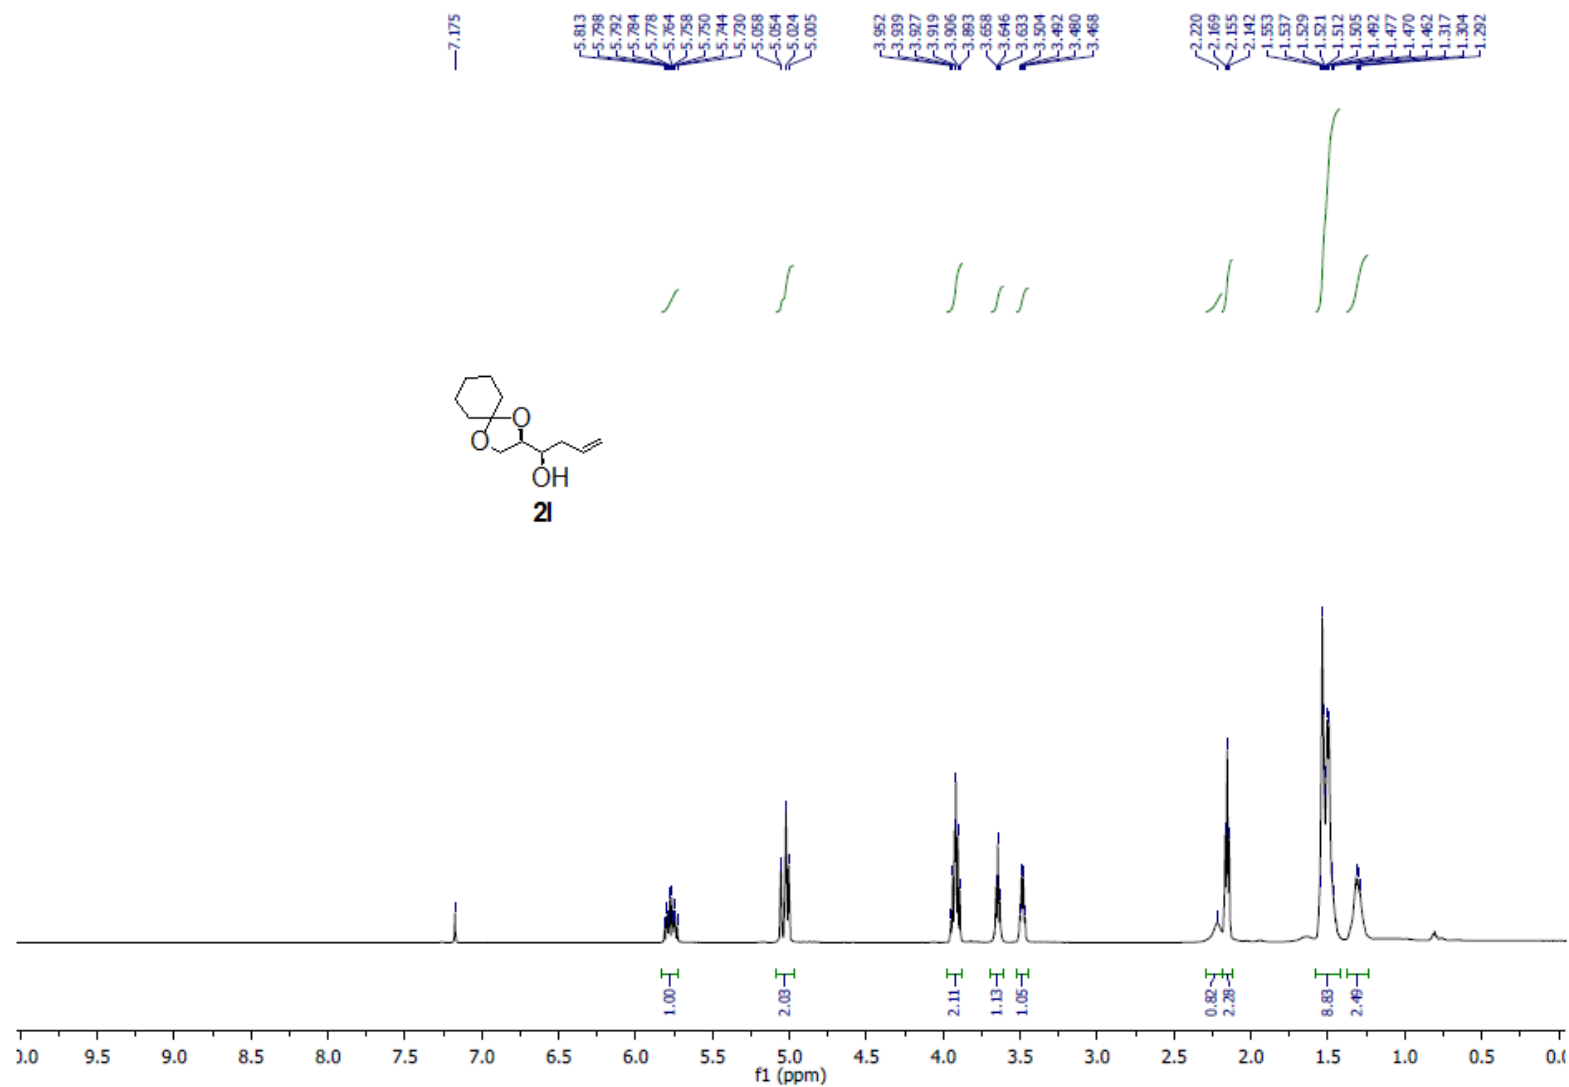



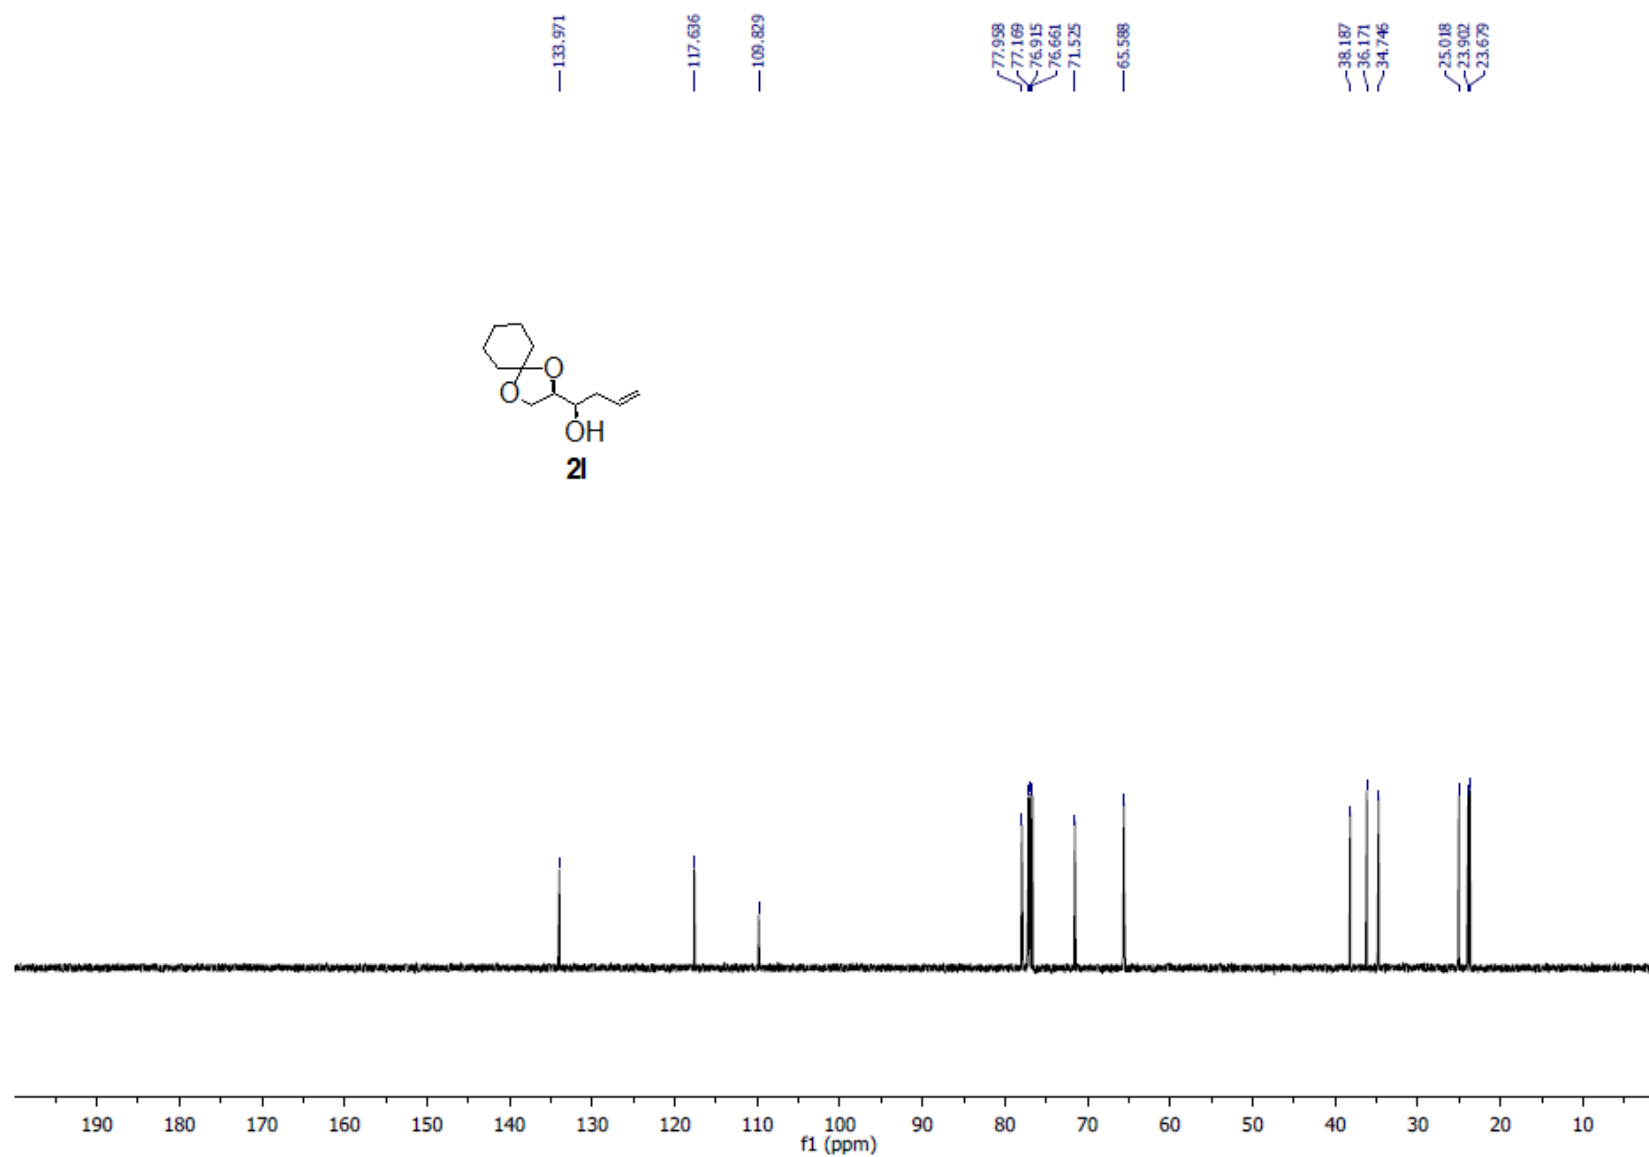

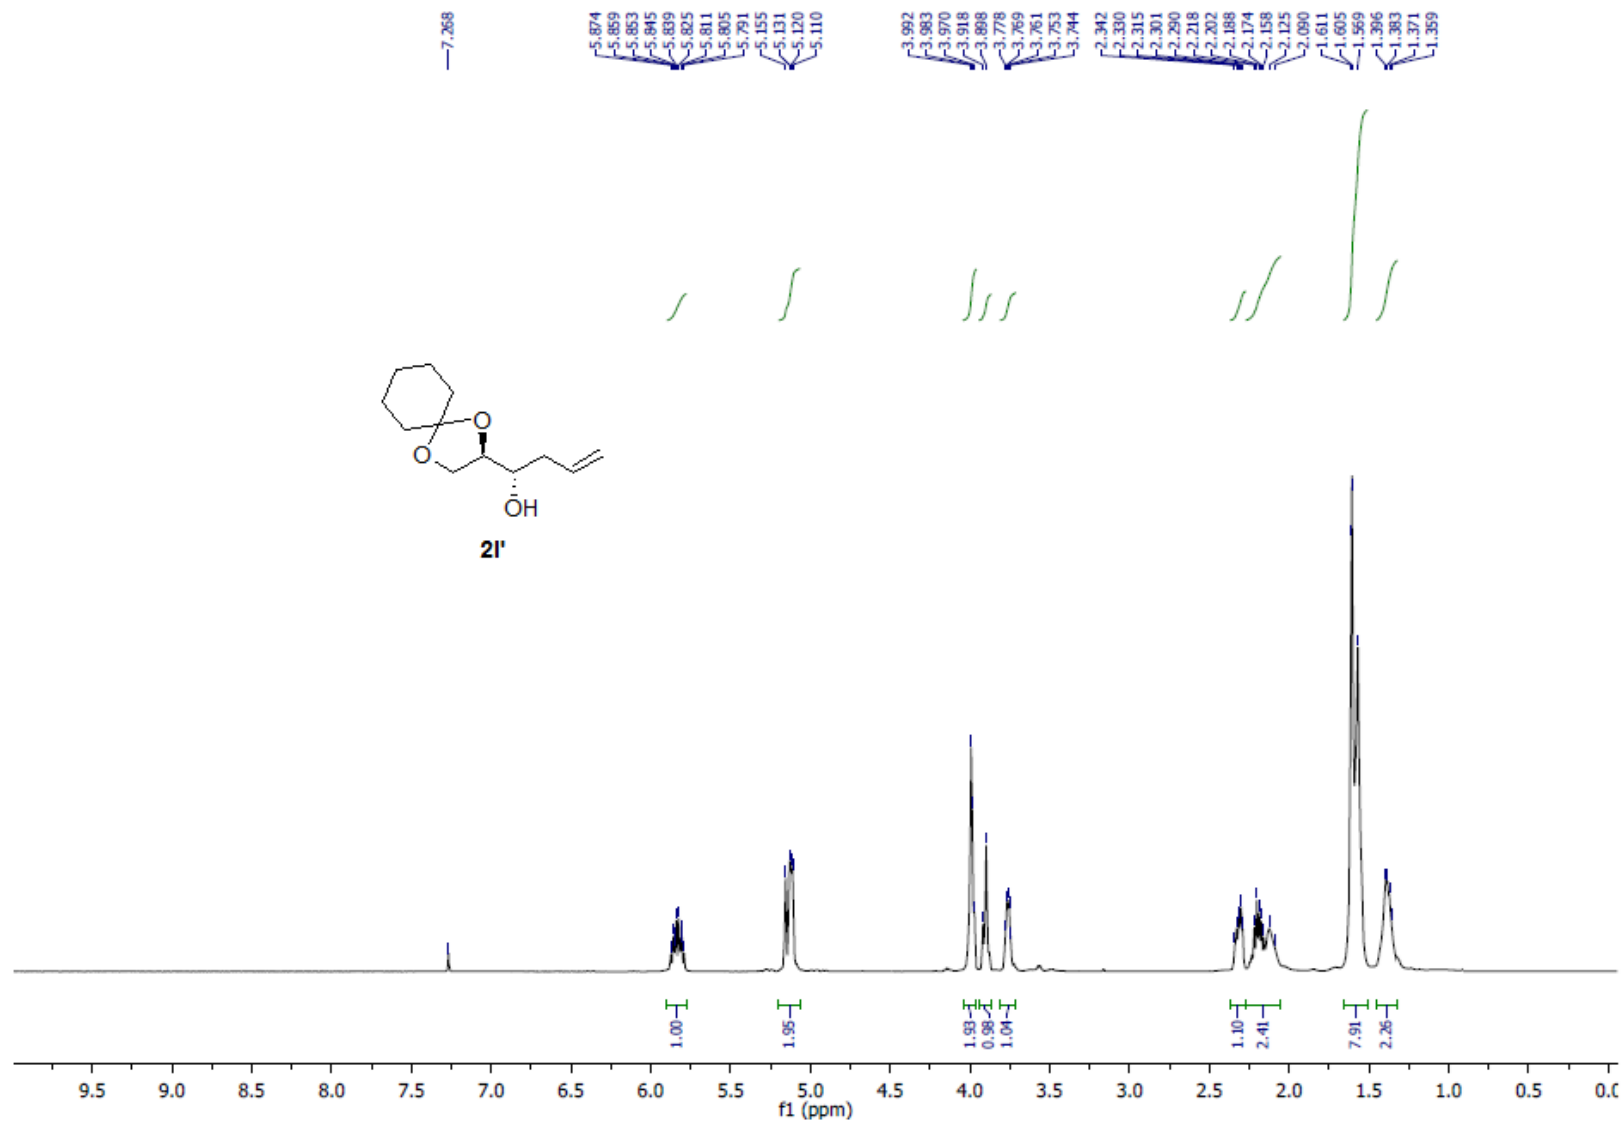

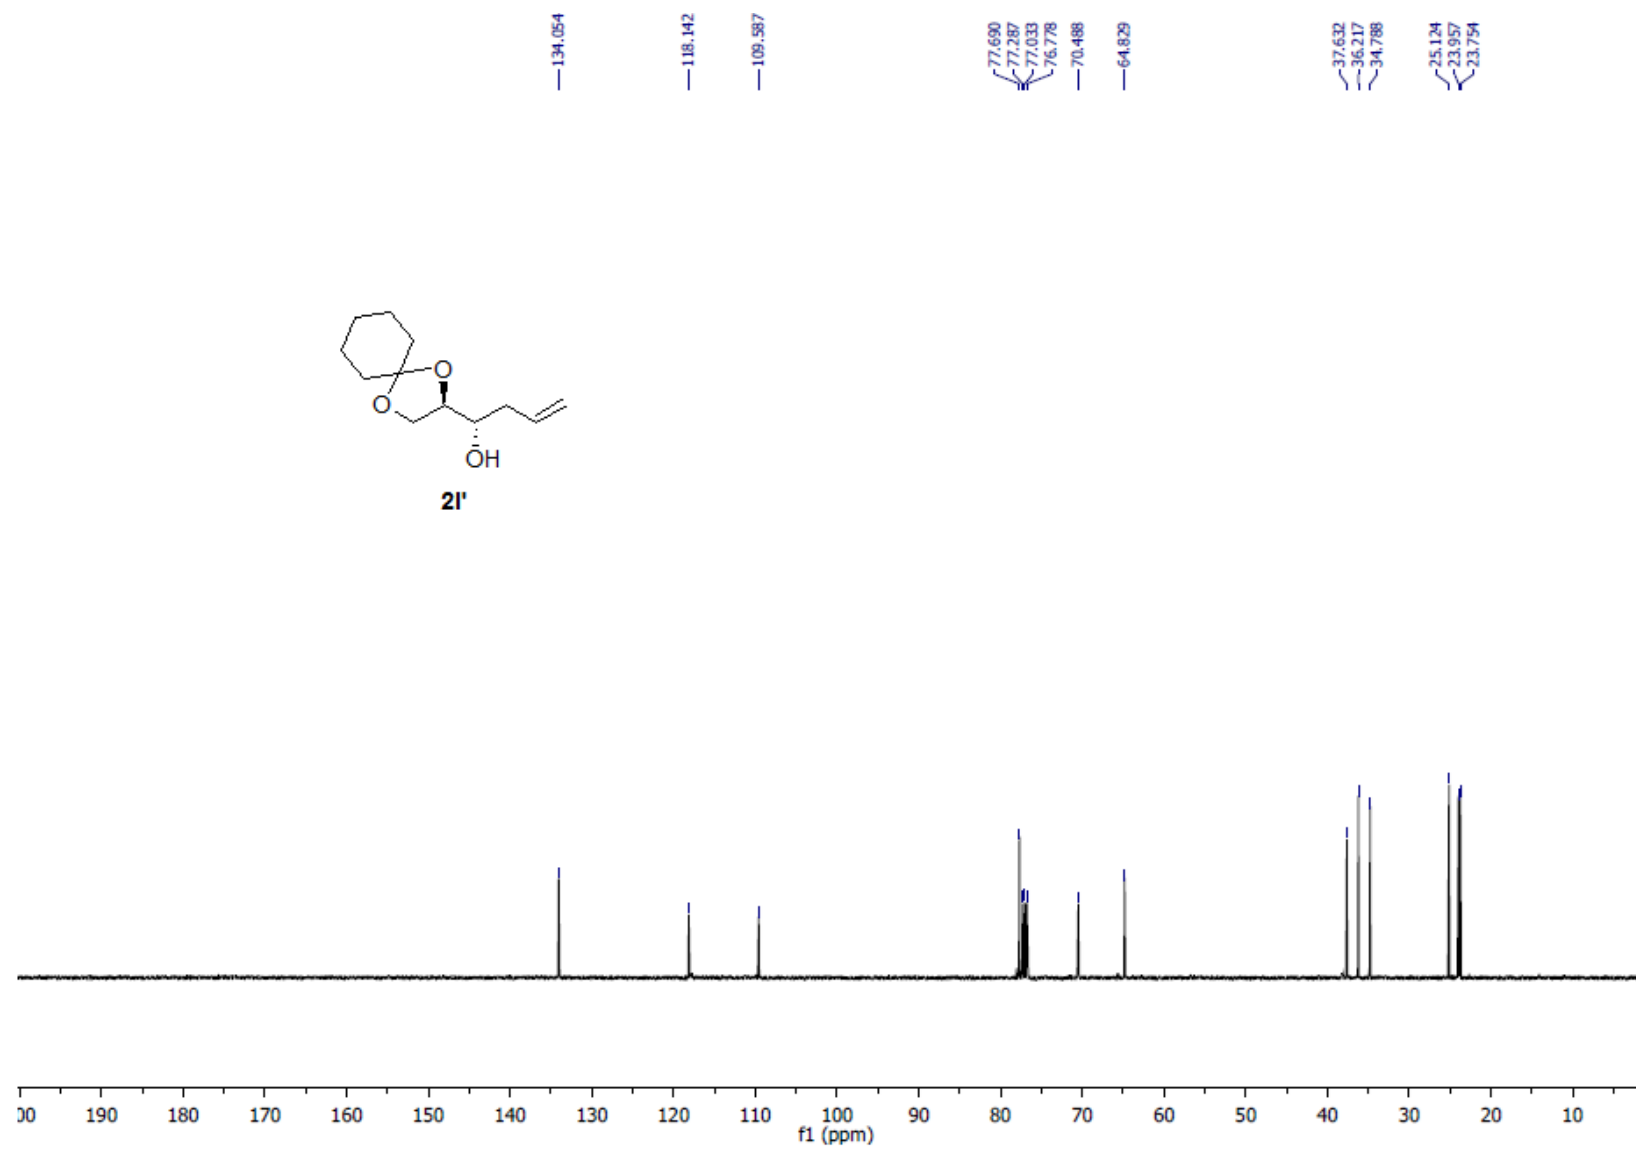

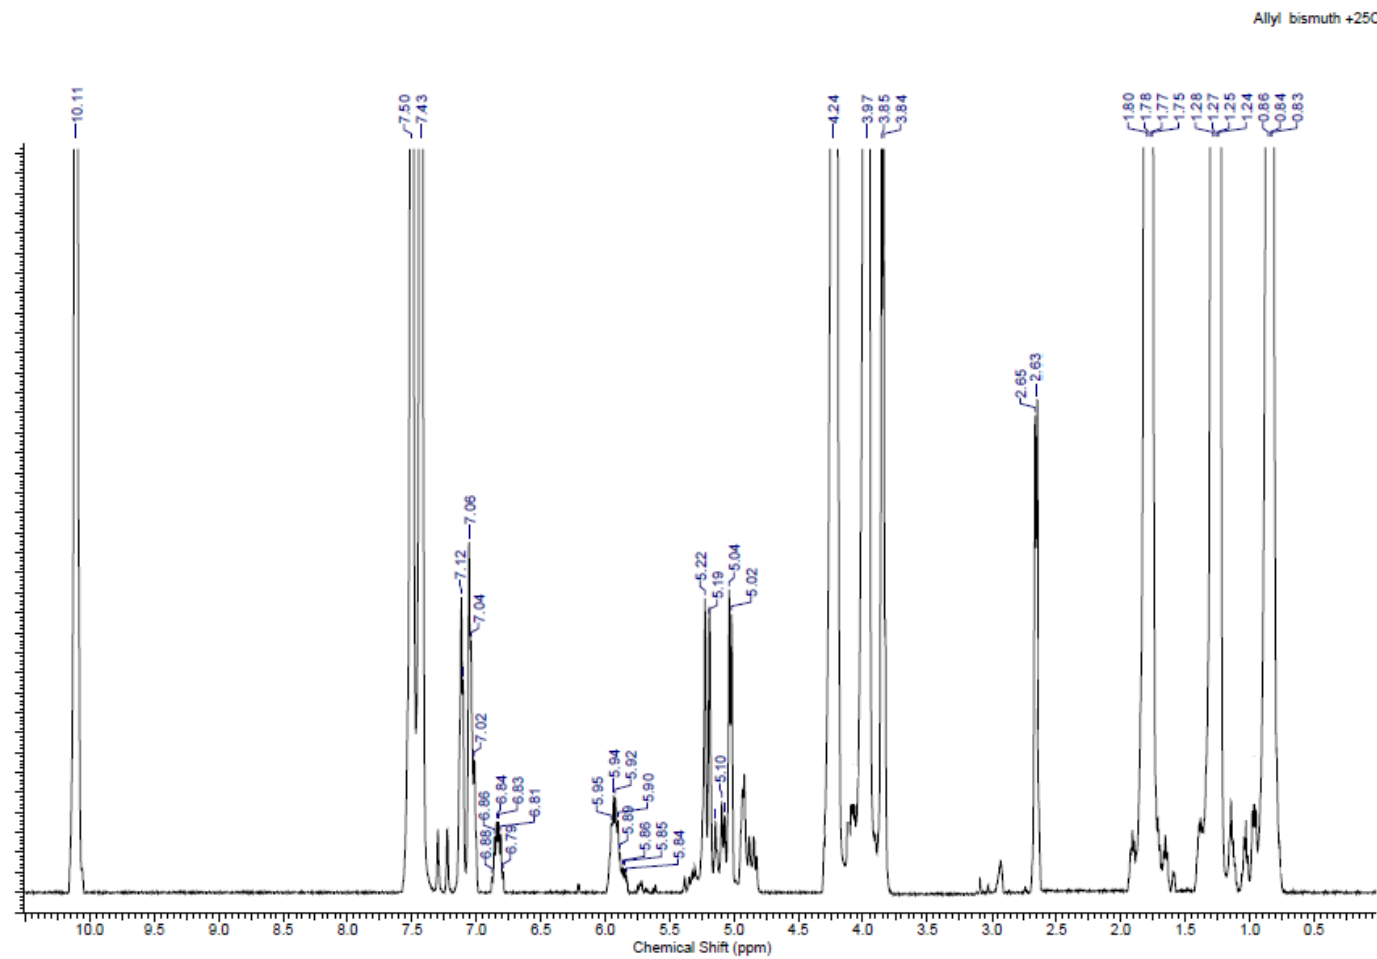

**Figure S1:** Formation of **I**, as evident from  $^1\text{H}$  NMR spectrum (recorded at room temperature in  $\text{CD}_2\text{Cl}_2$ ) of a stirred mixture of Bi and allyl bromide in  $[\text{bmim}][\text{Br}]$ .

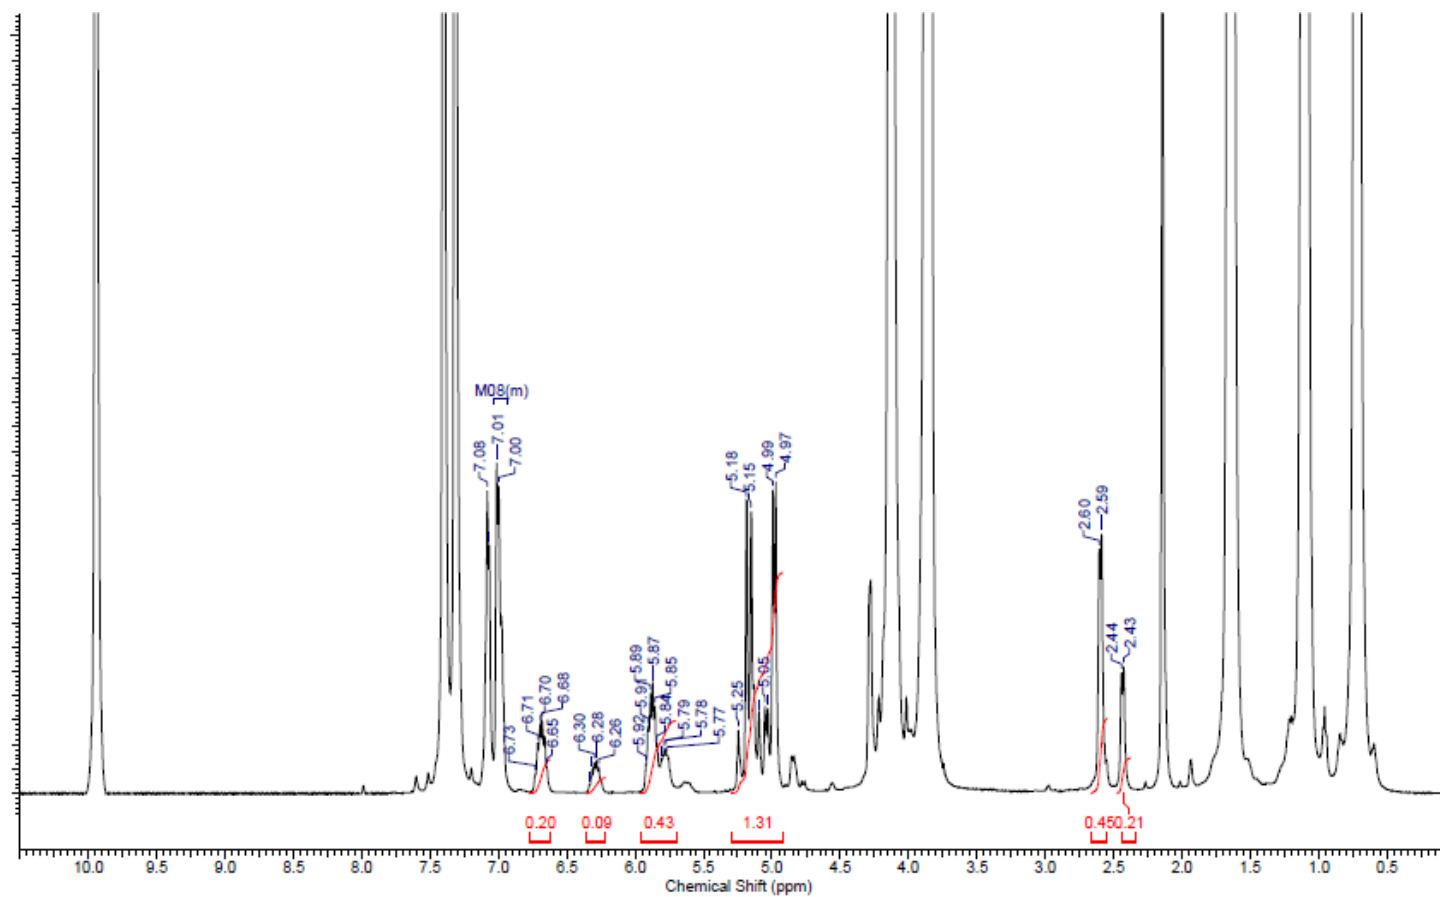

**Figure S2:** Formation of both **I** and **II**, as evident from  $^1\text{H}$  NMR spectrum (recorded at  $-70\text{ }^\circ\text{C}$  in  $\text{CD}_2\text{Cl}_2$ ) of a stirred mixture of Bi and allyl bromide in  $[\text{bmim}][\text{Br}]$ .
